# Supplementary material
Source: publisher site journal article supplement (https://www.dovepress.com/article/444797)
Supplement: Supplementary file 1 [file get_supplementary_file.php]

Questionnaire

“ The student-patient relationship during hospitalization and patient participation in clinical classes”

Please DO NOT sign the survey.

Sex:  Female  Male

Age: .....

Education:  Basic  Basic vocational  Secondary  Higher

Please tick the appropriate box next to each denoting statement:

1 – I strongly disagree

2 – I rather disagree

3 - I have no opinion

4 – I rather agree

5 – I strongly agree

| Statement                                                                                                          | 1 | 2 | 3 | 4 | 5 |
|--------------------------------------------------------------------------------------------------------------------|---|---|---|---|---|
| 1. It is important to me that students greet me when they enter the room.                                          |   |   |   |   |   |
| 2. It is important to me that students are neatly dressed.                                                         |   |   |   |   |   |
| 3. It bothers me when students keep their hands in their pockets during a conversation with me.                    |   |   |   |   |   |
| 4. It is important to me that students smile during classes with me.                                               |   |   |   |   |   |
| 5. I often notice that students in class look stressed and tense.                                                  |   |   |   |   |   |
| 6. I believe that students should always introduce themselves by their first and last name when entering the room. |   |   |   |   |   |
| 7. I think students use their phones too much during clinical classes.                                             |   |   |   |   |   |
| 8. I believe students should cover their tattoos during class.                                                     |   |   |   |   |   |
| 9. I believe that students should not wear expressive makeup during classes.                                       |   |   |   |   |   |
| 10. When entering the room, students should always say that they are students.                                     |   |   |   |   |   |
| 11. I believe that students use incomprehensible, medical terms too often when they talk to me.                    |   |   |   |   |   |
| 12. I think students use too much colloquial language.                                                             |   |   |   |   |   |

| Statement                                                                                                                   | 1 | 2 | 3 | 4 | 5 |
|-----------------------------------------------------------------------------------------------------------------------------|---|---|---|---|---|
| 13. I would like students to volunteer more often to examine me during class.                                               |   |   |   |   |   |
| 14. In my opinion, students do not care about ensuring privacy during clinical classes (e.g., by covering medical screens). |   |   |   |   |   |
| 15. I want the doctor to ask me before classes with students if I want to participate in them.                              |   |   |   |   |   |
| 16. I judge students by their approach to the doctor conducting the clinical classes.                                       |   |   |   |   |   |
| 17. I feel uncomfortable when the doctor leaves me alone with students.                                                     |   |   |   |   |   |
| 18. I am happy to participate in classes with students when I am before the procedure.                                      |   |   |   |   |   |
| 19. I am happy to participate in classes with students when I am after the procedure.                                       |   |   |   |   |   |
| 20. I would like students to always ask if they can do it before examining me.                                              |   |   |   |   |   |
| 21. I feel that students need me to become good medical professionals.                                                      |   |   |   |   |   |
| 22. It is important to me that students remember our previous conversations.                                                |   |   |   |   |   |
| 23. Talking to students helps me when I feel lonely.                                                                        |   |   |   |   |   |
| 24. I think that I participate in classes with students too often.                                                          |   |   |   |   |   |
| 25. Sometimes I like to talk to students about something other than my illness.                                             |   |   |   |   |   |
| 26. I notice that students talk too loudly in the corridor.                                                                 |   |   |   |   |   |
| 27. It worries me that students will not keep medical confidentiality.                                                      |   |   |   |   |   |
| 28. I do not feel comfortable when a student looks at my intimate area.                                                     |   |   |   |   |   |
| 29. I feel comfortable when a female student examines me.                                                                   |   |   |   |   |   |
| 30. I feel comfortable when a male student examines me.                                                                     |   |   |   |   |   |

## Badanie ankietowe

### “Analiza relacji student-pacjent podczas hospitalizacji ze szczególnym uwzględnieniem udziału pacjenta w zajęciach dydaktycznych”

PROSIMY O NIEPODPISYWANIE ANKIETY.

Płeć:  Kobieta

Mężczyzna Wiek: .....

Wykształcenie:  Podstawowe  Zasadnicze zawodowe  Średnie  Wyższe

Prosimy o zaznaczenie odpowiedniej kratki przy każdym stwierdzeniu, oznaczającej:

- 1 - Zupełnie się nie zgadzam
- 2 - Raczej się nie zgadzam
- 3 - Nie mam zdania, obojętne
- 4 - Raczej się zgadzam
- 5 - Zdecydowanie się zgadzam

| Stwierdzenie                                                                                             | 1 | 2 | 3 | 4 | 5 |
|----------------------------------------------------------------------------------------------------------|---|---|---|---|---|
| 1. Jest dla mnie ważne, by studenci przywitali się ze mną, wchodząc na salę.                             |   |   |   |   |   |
| 2. Ważne jest dla mnie to, by studenci byli schludnie ubrani.                                            |   |   |   |   |   |
| 3. Przeszkadza mi, gdy w trakcie rozmowy studenci trzymają ręce w kieszeniach.                           |   |   |   |   |   |
| 4. Ważne jest dla mnie, żeby studenci się uśmiechali podczas zajęć ze mną.                               |   |   |   |   |   |
| 5. Często zauważam, że studenci na zajęciach wyglądają na zestresowanych i spiętych.                     |   |   |   |   |   |
| 6. Uważam, że studenci powinni zawsze przedstawiać się imieniem i nazwiskiem wchodząc na salę.           |   |   |   |   |   |
| 7. Myślę, że studenci za często używają telefonu podczas zajęć klinicznych.                              |   |   |   |   |   |
| 8. Uważam, że studenci podczas zajęć powinni zakrywać swoje tatuaże.                                     |   |   |   |   |   |
| 9. Uważam, że studenci nie powinni mieć wyrazistego makijażu.                                            |   |   |   |   |   |
| 10. Wchodząc na salę, studenci powinni zawsze powiedzieć, że są studentami.                              |   |   |   |   |   |
| 11. Uważam, że studenci za często używają niezrozumiałych, medycznych sformułowań gdy ze mną rozmawiają. |   |   |   |   |   |
| 12. Uważam, że studenci używają zbyt potocznego języka.                                                  |   |   |   |   |   |

- 1 - Zupełnie się nie zgadzam  
 2 - Raczej się nie zgadzam  
 3 - Nie mam zdania, obojętne  
 4 - Raczej się zgadzam  
 5 - Zdecydowanie się zgadzam

| Stwierdzenie                                                                                                                                | 1 | 2 | 3 | 4 | 5 |
|---------------------------------------------------------------------------------------------------------------------------------------------|---|---|---|---|---|
| 13. Chciałabym/chciałbym, żeby studenci częściej sami zgłaszali się do zbadania mnie podczas zajęć.                                         |   |   |   |   |   |
| 14. W mojej opinii, studenci nie dbają o zapewnienie prywatności w czasie zajęć klinicznych (np. poprzez zasłonięcie parawanów medycznych). |   |   |   |   |   |
| 15. Zależy mi na tym, by lekarz przed zajęciami ze studentami zapytał mnie czy chcę w nich uczestniczyć.                                    |   |   |   |   |   |
| 16. Oceniam studentów po ich podejściu do lekarza prowadzącego zajęcia kliniczne.                                                           |   |   |   |   |   |
| 17. Czuję się niekomfortowo, gdy prowadzący zajęcia kliniczne lekarz zostawia mnie samą/samego ze studentami.                               |   |   |   |   |   |
| 18. Chętnie uczestniczę w zajęciach ze studentami, gdy jestem przed zabiegiem.                                                              |   |   |   |   |   |
| 19. Chętnie uczestniczę w zajęciach ze studentami, gdy jestem po zabiegu.                                                                   |   |   |   |   |   |
| 20. Chciałabym/chciałbym, żeby studenci przed zbadaniem mnie zawsze zapytali czy mogą to zrobić.                                            |   |   |   |   |   |
| 21. Czuję, że studenci potrzebują mnie, by mogli zostać dobrymi medykami.                                                                   |   |   |   |   |   |
| 22. Istotne jest dla mnie, by studenci pamiętali o naszych wcześniejszych rozmowach.                                                        |   |   |   |   |   |
| 23. Rozmowa ze studentami pomaga mi, gdy czuję się samotna/samotny.                                                                         |   |   |   |   |   |
| 24. Uważam, że za często uczestniczę w zajęciach ze studentami.                                                                             |   |   |   |   |   |
| 25. Lubię czasem porozmawiać ze studentami o czymś poza moją chorobą.                                                                       |   |   |   |   |   |
| 26. Zauważam, że studenci za głośno rozmawiają na korytarzu.                                                                                |   |   |   |   |   |
| 27. Martwi mnie, że studenci nie dochowają tajemnicy lekarskiej.                                                                            |   |   |   |   |   |
| 28. Nie czuję się komfortowo, kiedy studentka/student ogląda moje okolice intymne.                                                          |   |   |   |   |   |
| 29. Czuję się komfortowo, gdy bada mnie studentka (kobieta).                                                                                |   |   |   |   |   |
| 30. Czuję się komfortowo, gdy bada mnie student (mężczyzna).                                                                                |   |   |   |   |   |

| <b>1. I would like medical students to greet me upon entering the room.</b> |           |                     |             |                     |              |       |
|-----------------------------------------------------------------------------|-----------|---------------------|-------------|---------------------|--------------|-------|
| Answers                                                                     | Negative  | Moderately negative | Neutral     | Moderately positive | Positive     | TOTAL |
| Woman                                                                       | 8 (3.67%) | 0 (0.00%)           | 14 (6.42%)  | 48 (22.02%)         | 148 (67.89%) | 218   |
| Man                                                                         | 9 (4.86%) | 4 (2.16%)           | 22 (11.89%) | 38 (20.54%)         | 112 (60.54%) | 185   |
| General, Minimally Invasive and Endocrine Surgery                           | 3 (3.70%) | 0 (0.00%)           | 8 (9.88%)   | 19 (23.46%)         | 51 (62.96%)  | 81    |
| Internal Medicine, Occupational Diseases and Hypertension                   | 4 (4.76%) | 1 (1.19%)           | 12 (14.29%) | 14 (16.67%)         | 53 (63.10%)  | 84    |
| Gynecology and Obstetrics                                                   | 1 (1.25%) | 0 (0.00%)           | 6 (7.50%)   | 21 (26.25%)         | 52 (65.00%)  | 80    |
| Orthopedic and Traumatologic Surgery                                        | 3 (3.85%) | 1 (1.28%)           | 5 (6.41%)   | 20 (25.64%)         | 49 (62.82%)  | 78    |
| Urology and Oncologic Urology                                               | 6 (7.50%) | 2 (2.50%)           | 5 (6.25%)   | 12 (15.00%)         | 55 (68.75%)  | 80    |
| 18-35 years old                                                             | 4 (4.94%) | 1 (1.23%)           | 8 (9.88%)   | 21 (25.93%)         | 47 (58.02%)  | 81    |
| 36-49 years old                                                             | 3 (3.37%) | 0 (0.00%)           | 6 (6.74%)   | 26 (29.21%)         | 54 (60.67%)  | 89    |
| 50-64 years old                                                             | 4 (4.82%) | 1 (1.20%)           | 14 (16.87%) | 15 (18.07%)         | 49 (59.04%)  | 83    |
| 65-70 years old                                                             | 4 (6.25%) | 0 (0.00%)           | 4 (6.25%)   | 13 (20.31%)         | 43 (67.19%)  | 64    |
| 71-92 years old                                                             | 2 (2.33%) | 2 (2.33%)           | 4 (4.65%)   | 11 (12.79%)         | 67 (77.91%)  | 86    |
| Primary                                                                     | 1 (3.23%) | 2 (6.45%)           | 1 (3.23%)   | 5 (16.13%)          | 22 (70.97%)  | 31    |
| Secondary                                                                   | 6 (4.29%) | 0 (0.00%)           | 7 (5.00%)   | 37 (26.43%)         | 90 (64.29%)  | 140   |
| Higher                                                                      | 5 (3.31%) | 0 (0.00%)           | 20 (13.25%) | 29 (19.21%)         | 97 (64.24%)  | 151   |
| Basic vocational                                                            | 5 (6.17%) | 2 (2.47%)           | 8 (9.88%)   | 15 (18.52%)         | 51 (62.96%)  | 81    |

| <b>2. I pay attention to the neatness of medical students' clothes.</b> |           |                     |             |                     |              |       |
|-------------------------------------------------------------------------|-----------|---------------------|-------------|---------------------|--------------|-------|
| Answers                                                                 | Negative  | Moderately negative | Neutral     | Moderately positive | Positive     | TOTAL |
| Woman                                                                   | 6 (2.75%) | 1 (0.46%)           | 27 (12.39%) | 53 (24.31%)         | 131 (60.09%) | 218   |
| Man                                                                     | 8 (4.32%) | 6 (3.24%)           | 24 (12.97%) | 55 (29.73%)         | 92 (49.73%)  | 185   |
| General, Minimally Invasive and Endocrine Surgery                       | 4 (4.94%) | 2 (2.47%)           | 12 (14.81%) | 18 (22.22%)         | 45 (55.56%)  | 81    |
| Internal Medicine, Occupational Diseases and Hypertension               | 5 (5.95%) | 1 (1.19%)           | 13 (15.48%) | 19 (22.62%)         | 46 (54.76%)  | 84    |
| Gynecology and Obstetrics                                               | 0 (0.00%) | 0 (0.00%)           | 9 (11.25%)  | 27 (33.75%)         | 44 (55.00%)  | 80    |
| Orthopedic and Traumatologic Surgery                                    | 4 (5.13%) | 3 (3.85%)           | 10 (12.82%) | 27 (34.62%)         | 34 (43.59%)  | 78    |
| Urology and Oncologic Urology                                           | 1 (1.25%) | 1 (1.25%)           | 7 (8.75%)   | 17 (21.25%)         | 54 (67.50%)  | 80    |
| 18-35 years old                                                         | 4 (4.94%) | 1 (1.23%)           | 21 (25.93%) | 29 (35.80%)         | 26 (32.10%)  | 81    |
| 36-49 years old                                                         | 1 (1.12%) | 2 (2.25%)           | 13 (14.61%) | 30 (33.71%)         | 43 (48.31%)  | 89    |
| 50-64 years old                                                         | 4 (4.82%) | 3 (3.61%)           | 9 (10.84%)  | 26 (31.33%)         | 41 (49.40%)  | 83    |
| 65-70 years old                                                         | 2 (3.13%) | 1 (1.56%)           | 5 (7.81%)   | 14 (21.88%)         | 42 (65.63%)  | 64    |
| 71-92 years old                                                         | 3 (3.49%) | 0 (0.00%)           | 3 (3.49%)   | 9 (10.47%)          | 71 (82.56%)  | 86    |
| Primary                                                                 | 2 (6.45%) | 2 (6.45%)           | 5 (16.13%)  | 6 (19.35%)          | 16 (51.61%)  | 31    |
| Secondary                                                               | 4 (2.86%) | 1 (0.71%)           | 12 (8.57%)  | 39 (27.86%)         | 84 (60.00%)  | 140   |
| Higher                                                                  | 3 (1.99%) | 1 (0.66%)           | 25 (16.56%) | 48 (31.79%)         | 74 (49.01%)  | 151   |
| Basic vocational                                                        | 5 (6.17%) | 3 (3.70%)           | 9 (11.11%)  | 15 (18.52%)         | 49 (60.49%)  | 81    |

| <b>3. I am bothered when medical students keep hands in their pockets.</b> |             |                     |             |                     |             |       |
|----------------------------------------------------------------------------|-------------|---------------------|-------------|---------------------|-------------|-------|
| Answers                                                                    | Negative    | Moderately negative | Neutral     | Moderately positive | Positive    | TOTAL |
| Woman                                                                      | 31 (14.22%) | 19 (8.72%)          | 68 (31.19%) | 42 (19.27%)         | 58 (26.61%) | 218   |
| Man                                                                        | 40 (21.62%) | 13 (7.03%)          | 45 (24.32%) | 32 (17.30%)         | 55 (29.73%) | 185   |
| General, Minimally Invasive and Endocrine Surgery                          | 13 (16.05%) | 5 (6.17%)           | 27 (33.33%) | 9 (11.11%)          | 27 (33.33%) | 81    |
| Internal Medicine, Occupational Diseases and Hypertension                  | 14 (16.67%) | 8 (9.52%)           | 21 (25.00%) | 17 (20.24%)         | 24 (28.57%) | 84    |
| Gynecology and Obstetrics                                                  | 7 (8.75%)   | 4 (5.00%)           | 32 (40.00%) | 18 (22.50%)         | 19 (23.75%) | 80    |
| Orthopedic and Traumatologic Surgery                                       | 24 (30.77%) | 7 (8.97%)           | 16 (20.51%) | 13 (16.67%)         | 18 (23.08%) | 78    |
| Urology and Oncologic Urology                                              | 13 (16.25%) | 8 (10.00%)          | 17 (21.25%) | 17 (21.25%)         | 25 (31.25%) | 80    |
| 18-35 years old                                                            | 13 (16.05%) | 7 (8.64%)           | 24 (29.63%) | 20 (24.69%)         | 17 (20.99%) | 81    |
| 36-49 years old                                                            | 10 (11.24%) | 5 (5.62%)           | 30 (33.71%) | 16 (17.98%)         | 28 (31.46%) | 89    |
| 50-64 years old                                                            | 18 (21.69%) | 7 (8.43%)           | 29 (34.94%) | 14 (16.87%)         | 15 (18.07%) | 83    |
| 65-70 years old                                                            | 17 (26.56%) | 3 (4.69%)           | 15 (23.44%) | 10 (15.63%)         | 19 (29.69%) | 64    |
| 71-92 years old                                                            | 13 (15.12%) | 10 (11.63%)         | 15 (17.44%) | 14 (16.28%)         | 34 (39.53%) | 86    |
| Primary                                                                    | 9 (29.03%)  | 3 (9.68%)           | 4 (12.90%)  | 5 (16.13%)          | 10 (32.26%) | 31    |
| Secondary                                                                  | 27 (19.29%) | 12 (8.57%)          | 39 (27.86%) | 23 (16.43%)         | 39 (27.86%) | 140   |
| Higher                                                                     | 16 (10.60%) | 9 (5.96%)           | 45 (29.80%) | 35 (23.18%)         | 46 (30.46%) | 151   |
| Basic vocational                                                           | 19 (23.46%) | 8 (9.88%)           | 25 (30.86%) | 11 (13.58%)         | 18 (22.22%) | 81    |

**4. I would prefer medical students to be smiling during interactions with patients.**

| Answers                                                   | Negative   | Moderately negative | Neutral     | Moderately positive | Positive    | TOTAL |
|-----------------------------------------------------------|------------|---------------------|-------------|---------------------|-------------|-------|
| Woman                                                     | 9 (4.13%)  | 13 (5.96%)          | 47 (21.56%) | 69 (31.65%)         | 80 (36.70%) | 218   |
| Man                                                       | 15 (8.11%) | 7 (3.78%)           | 51 (27.57%) | 41 (22.16%)         | 71 (38.38%) | 185   |
| General, Minimally Invasive and Endocrine Surgery         | 5 (6.17%)  | 3 (3.70%)           | 20 (24.69%) | 16 (19.75%)         | 37 (45.68%) | 81    |
| Internal Medicine, Occupational Diseases and Hypertension | 4 (4.76%)  | 5 (5.95%)           | 24 (28.57%) | 22 (26.19%)         | 29 (34.52%) | 84    |
| Gynecology and Obstetrics                                 | 2 (2.50%)  | 3 (3.75%)           | 22 (27.50%) | 34 (42.50%)         | 19 (23.75%) | 80    |
| Orthopedic and Traumatologic Surgery                      | 7 (8.97%)  | 5 (6.41%)           | 20 (25.64%) | 22 (28.21%)         | 24 (30.77%) | 78    |
| Urology and Oncologic Urology                             | 6 (7.50%)  | 4 (5.00%)           | 12 (15.00%) | 16 (20.00%)         | 42 (52.50%) | 80    |
| 18-35 years old                                           | 4 (4.94%)  | 5 (6.17%)           | 27 (33.33%) | 29 (35.80%)         | 16 (19.75%) | 81    |
| 36-49 years old                                           | 4 (4.49%)  | 2 (2.25%)           | 29 (32.58%) | 32 (35.96%)         | 22 (24.72%) | 89    |
| 50-64 years old                                           | 4 (4.82%)  | 6 (7.23%)           | 25 (30.12%) | 19 (22.89%)         | 29 (34.94%) | 83    |
| 65-70 years old                                           | 4 (6.25%)  | 4 (6.25%)           | 8 (12.50%)  | 16 (25.00%)         | 32 (50.00%) | 64    |
| 71-92 years old                                           | 8 (9.30%)  | 3 (3.49%)           | 9 (10.47%)  | 14 (16.28%)         | 52 (60.47%) | 86    |
| Primary                                                   | 3 (9.68%)  | 1 (3.23%)           | 6 (19.35%)  | 6 (19.35%)          | 15 (48.39%) | 31    |
| Secondary                                                 | 9 (6.43%)  | 8 (5.71%)           | 31 (22.14%) | 41 (29.29%)         | 51 (36.43%) | 140   |
| Higher                                                    | 7 (4.64%)  | 8 (5.30%)           | 44 (29.14%) | 47 (31.13%)         | 45 (29.80%) | 151   |
| Basic vocational                                          | 5 (6.17%)  | 3 (3.70%)           | 17 (20.99%) | 16 (19.75%)         | 40 (49.38%) | 81    |

**5. I frequently observe that medical students seem stressed during clinical classes.**

| Answers                                                   | Negative    | Moderately negative | Neutral     | Moderately positive | Positive    | TOTAL |
|-----------------------------------------------------------|-------------|---------------------|-------------|---------------------|-------------|-------|
| Woman                                                     | 36 (16.51%) | 40 (18.35%)         | 63 (28.90%) | 39 (17.89%)         | 40 (18.35%) | 218   |
| Man                                                       | 31 (16.76%) | 34 (18.38%)         | 56 (30.27%) | 42 (22.70%)         | 22 (11.89%) | 185   |
| General, Minimally Invasive and Endocrine Surgery         | 13 (16.05%) | 13 (16.05%)         | 29 (35.80%) | 12 (14.58%)         | 14 (17.28%) | 81    |
| Internal Medicine, Occupational Diseases and Hypertension | 17 (20.24%) | 18 (21.43%)         | 15 (17.86%) | 20 (23.81%)         | 14 (16.67%) | 84    |
| Gynecology and Obstetrics                                 | 3 (3.75%)   | 23 (28.75%)         | 25 (31.25%) | 15 (18.75%)         | 14 (17.50%) | 80    |
| Orthopedic and Traumatologic Surgery                      | 16 (20.51%) | 12 (15.38%)         | 22 (28.21%) | 19 (24.36%)         | 9 (11.54%)  | 78    |
| Urology and Oncologic Urology                             | 18 (22.50%) | 8 (10.00%)          | 28 (35.00%) | 15 (18.75%)         | 11 (13.75%) | 80    |
| 18-35 years old                                           | 10 (12.35%) | 20 (24.69%)         | 30 (37.04%) | 15 (18.52%)         | 6 (7.41%)   | 81    |
| 36-49 years old                                           | 8 (8.99%)   | 19 (21.35%)         | 30 (33.71%) | 19 (21.35%)         | 13 (14.61%) | 89    |
| 50-64 years old                                           | 19 (22.89%) | 13 (15.66%)         | 26 (31.33%) | 13 (15.66%)         | 12 (14.46%) | 83    |
| 65-70 years old                                           | 8 (12.50%)  | 10 (15.63%)         | 16 (25.00%) | 19 (29.69%)         | 11 (17.19%) | 64    |
| 71-92 years old                                           | 22 (25.58%) | 12 (13.95%)         | 17 (19.77%) | 15 (17.44%)         | 20 (23.26%) | 86    |
| Primary                                                   | 6 (19.35%)  | 2 (6.45%)           | 12 (38.71%) | 6 (19.35%)          | 5 (16.13%)  | 31    |
| Secondary                                                 | 24 (17.14%) | 28 (20.00%)         | 28 (20.00%) | 27 (19.29%)         | 33 (23.57%) | 140   |
| Higher                                                    | 18 (11.92%) | 30 (19.87%)         | 56 (37.09%) | 33 (21.85%)         | 14 (9.27%)  | 151   |
| Basic vocational                                          | 19 (23.46%) | 14 (17.28%)         | 23 (28.40%) | 15 (18.52%)         | 10 (12.35%) | 81    |

**6. I believe medical students should always introduce themselves by their full name.**

| Answers                                                   | Negative    | Moderately negative | Neutral     | Moderately positive | Positive    | TOTAL |
|-----------------------------------------------------------|-------------|---------------------|-------------|---------------------|-------------|-------|
| Woman                                                     | 32 (14.68%) | 27 (12.39%)         | 55 (25.23%) | 46 (21.10%)         | 58 (26.61%) | 218   |
| Man                                                       | 39 (21.08%) | 30 (16.22%)         | 33 (17.84%) | 37 (20.00%)         | 46 (24.86%) | 185   |
| General, Minimally Invasive and Endocrine Surgery         | 11 (13.58%) | 11 (13.58%)         | 21 (25.93%) | 15 (18.52%)         | 23 (28.40%) | 81    |
| Internal Medicine, Occupational Diseases and Hypertension | 18 (21.43%) | 9 (10.71%)          | 17 (20.24%) | 20 (23.81%)         | 20 (23.81%) | 84    |
| Gynecology and Obstetrics                                 | 7 (8.75%)   | 13 (16.25%)         | 23 (28.75%) | 19 (23.75%)         | 18 (22.50%) | 80    |
| Orthopedic and Traumatologic Surgery                      | 19 (24.36%) | 13 (16.67%)         | 16 (20.51%) | 11 (14.10%)         | 19 (24.36%) | 78    |
| Urology and Oncologic Urology                             | 16 (20.00%) | 11 (13.75%)         | 11 (13.75%) | 18 (22.50%)         | 24 (30.00%) | 80    |
| 18-35 years old                                           | 13 (16.05%) | 17 (20.99%)         | 26 (32.10%) | 16 (19.75%)         | 9 (11.11%)  | 81    |
| 36-49 years old                                           | 9 (10.11%)  | 20 (22.47%)         | 22 (24.72%) | 26 (29.21%)         | 12 (13.48%) | 89    |
| 50-64 years old                                           | 16 (19.28%) | 10 (12.05%)         | 16 (19.28%) | 13 (15.66%)         | 28 (33.73%) | 83    |
| 65-70 years old                                           | 14 (21.88%) | 8 (12.50%)          | 14 (21.88%) | 10 (15.63%)         | 18 (28.13%) | 64    |
| 71-92 years old                                           | 19 (22.09%) | 2 (2.33%)           | 10 (11.63%) | 18 (20.93%)         | 37 (43.02%) | 86    |
| Primary                                                   | 4 (12.90%)  | 4 (12.90%)          | 5 (16.13%)  | 7 (22.58%)          | 11 (35.48%) | 31    |
| Secondary                                                 | 30 (21.43%) | 19 (13.57%)         | 30 (21.43%) | 22 (15.71%)         | 39 (27.86%) | 140   |
| Higher                                                    | 21 (13.91%) | 27 (17.88%)         | 39 (25.83%) | 36 (23.84%)         | 28 (18.54%) | 151   |
| Basic vocational                                          | 16 (19.75%) | 7 (8.64%)           | 14 (17.28%) | 18 (22.22%)         | 26 (32.10%) | 81    |

| <b>7. I believe medical students use their mobile phones too often.</b> |             |                     |             |                     |             |       |
|-------------------------------------------------------------------------|-------------|---------------------|-------------|---------------------|-------------|-------|
| Answers                                                                 | Negative    | Moderately negative | Neutral     | Moderately positive | Positive    | TOTAL |
| Woman                                                                   | 57 (26.15%) | 40 (18.35%)         | 81 (37.16%) | 21 (9.63%)          | 19 (8.72%)  | 218   |
| Man                                                                     | 48 (25.95%) | 21 (11.35%)         | 63 (34.05%) | 32 (17.30%)         | 21 (11.25%) | 185   |
| General, Minimally Invasive and Endocrine Surgery                       | 19 (23.46%) | 13 (16.05%)         | 28 (34.57%) | 10 (12.35%)         | 11 (13.58%) | 81    |
| Internal Medicine, Occupational Diseases and Hypertension               | 25 (29.76%) | 12 (14.29%)         | 25 (29.76%) | 14 (16.67%)         | 8 (9.52%)   | 84    |
| Gynecology and Obstetrics                                               | 14 (17.50%) | 18 (22.50%)         | 33 (41.25%) | 8 (10.00%)          | 7 (8.75%)   | 80    |
| Orthopedic and Traumatologic Surgery                                    | 30 (38.46%) | 9 (11.54%)          | 27 (34.62%) | 10 (12.82%)         | 2 (2.56%)   | 78    |
| Urology and Oncologic Urology                                           | 17 (21.25%) | 9 (11.25%)          | 31 (38.75%) | 11 (13.75%)         | 12 (15.00%) | 80    |
| 18-35 years old                                                         | 20 (24.69%) | 16 (19.75%)         | 30 (37.04%) | 11 (13.58%)         | 4 (4.94%)   | 81    |
| 36-49 years old                                                         | 20 (22.47%) | 15 (16.85%)         | 39 (43.82%) | 9 (10.11%)          | 6 (6.74%)   | 89    |
| 50-64 years old                                                         | 19 (22.89%) | 12 (14.46%)         | 32 (38.55%) | 9 (10.84%)          | 11 (13.25%) | 83    |
| 65-70 years old                                                         | 17 (26.56%) | 7 (10.94%)          | 14 (21.88%) | 16 (25.00%)         | 10 (15.63%) | 64    |
| 71-92 years old                                                         | 29 (33.75%) | 11 (12.79%)         | 29 (33.72%) | 8 (9.30%)           | 9 (10.47%)  | 86    |
| Primary                                                                 | 14 (45.16%) | 2 (6.45%)           | 9 (29.03%)  | 4 (12.90%)          | 2 (6.45%)   | 31    |
| Secondary                                                               | 44 (31.43%) | 22 (15.71%)         | 43 (30.71%) | 17 (12.14%)         | 14 (10.00%) | 140   |
| Higher                                                                  | 26 (17.22%) | 26 (17.22%)         | 66 (43.71%) | 19 (12.58%)         | 14 (9.27%)  | 151   |
| Basic vocational                                                        | 21 (25.93%) | 11 (13.58%)         | 26 (32.10%) | 13 (16.05%)         | 10 (12.35%) | 81    |

| <b>8. I believe medical students should cover their tattoos.</b> |             |                     |             |                     |             |       |
|------------------------------------------------------------------|-------------|---------------------|-------------|---------------------|-------------|-------|
| Answers                                                          | Negative    | Moderately negative | Neutral     | Moderately positive | Positive    | TOTAL |
| Woman                                                            | 98 (44.95%) | 17 (7.80%)          | 61 (27.98%) | 13 (5.96%)          | 29 (13.30%) | 218   |
| Man                                                              | 83 (44.86%) | 10 (5.41%)          | 44 (23.78%) | 14 (7.57%)          | 34 (18.38%) | 185   |
| General, Minimally Invasive and Endocrine Surgery                | 36 (44.44%) | 2 (2.47%)           | 23 (28.40%) | 6 (7.41%)           | 14 (17.28%) | 81    |
| Internal Medicine, Occupational Diseases and Hypertension        | 35 (41.67%) | 6 (7.14%)           | 25 (29.76%) | 7 (8.33%)           | 11 (13.10%) | 84    |
| Gynecology and Obstetrics                                        | 35 (43.75%) | 11 (13.75%)         | 27 (33.75%) | 3 (3.75%)           | 4 (5.00%)   | 80    |
| Orthopedic and Traumatologic Surgery                             | 44 (56.41%) | 4 (5.13%)           | 14 (17.95%) | 3 (3.85%)           | 13 (16.67%) | 78    |
| Urology and Oncologic Urology                                    | 31 (38.75%) | 4 (5.00%)           | 16 (20.00%) | 8 (10.00%)          | 21 (26.25%) | 80    |
| 18-35 years old                                                  | 51 (62.96%) | 7 (8.64%)           | 19 (23.46%) | 3 (3.70%)           | 1 (1.23%)   | 81    |
| 36-49 years old                                                  | 41 (46.07%) | 6 (6.74%)           | 27 (20.34%) | 7 (7.87%)           | 8 (8.99%)   | 89    |
| 50-64 years old                                                  | 38 (45.78%) | 9 (10.84%)          | 27 (32.53%) | 3 (3.61%)           | 6 (7.23%)   | 83    |
| 65-70 years old                                                  | 26 (40.63%) | 3 (4.69%)           | 10 (15.63%) | 8 (12.50%)          | 17 (26.56%) | 64    |
| 71-92 years old                                                  | 25 (29.07%) | 2 (2.33%)           | 22 (25.58%) | 6 (6.98%)           | 31 (36.05%) | 86    |
| Primary                                                          | 14 (45.16%) | 1 (3.23%)           | 5 (16.13%)  | 1 (3.23%)           | 10 (32.26%) | 31    |
| Secondary                                                        | 62 (44.29%) | 7 (5.00%)           | 42 (30.00%) | 9 (6.43%)           | 20 (14.29%) | 140   |
| Higher                                                           | 74 (49.01%) | 14 (9.27%)          | 42 (27.81%) | 5 (3.31%)           | 16 (10.60%) | 151   |
| Basic vocational                                                 | 31 (38.27%) | 5 (6.17%)           | 16 (19.75%) | 12 (14.81%)         | 17 (20.99%) | 81    |

| <b>9. I believe medical students should not wear expressive makeup.</b> |             |                     |             |                     |             |       |
|-------------------------------------------------------------------------|-------------|---------------------|-------------|---------------------|-------------|-------|
| Answers                                                                 | Negative    | Moderately negative | Neutral     | Moderately positive | Positive    | TOTAL |
| Woman                                                                   | 72 (33.03%) | 25 (11.47%)         | 60 (27.52%) | 33 (15.14%)         | 28 (12.84%) | 218   |
| Man                                                                     | 55 (29.73%) | 24 (12.97%)         | 54 (29.19%) | 23 (12.43%)         | 29 (15.68%) | 185   |
| General, Minimally Invasive and Endocrine Surgery                       | 26 (32.10%) | 10 (12.35%)         | 20 (24.69%) | 8 (9.88%)           | 17 (20.99%) | 81    |
| Internal Medicine, Occupational Diseases and Hypertension               | 21 (25.00%) | 9 (10.71%)          | 30 (35.71%) | 15 (17.86%)         | 9 (10.71%)  | 84    |
| Gynecology and Obstetrics                                               | 25 (31.25%) | 11 (13.75%)         | 30 (37.50%) | 12 (15.00%)         | 2 (2.50%)   | 80    |
| Orthopedic and Traumatologic Surgery                                    | 36 (46.15%) | 8 (10.26%)          | 15 (19.23%) | 8 (10.26%)          | 11 (14.10%) | 78    |
| Urology and Oncologic Urology                                           | 19 (23.75%) | 11 (13.75%)         | 19 (23.75%) | 13 (16.25%)         | 18 (22.50%) | 80    |
| 18-35 years old                                                         | 40 (49.38%) | 10 (12.35%)         | 27 (33.33%) | 4 (4.94%)           | 0 (0.00%)   | 81    |
| 36-49 years old                                                         | 21 (23.60%) | 21 (23.60%)         | 25 (28.09%) | 13 (14.61%)         | 9 (10.11%)  | 89    |
| 50-64 years old                                                         | 26 (31.33%) | 8 (9.64%)           | 29 (34.94%) | 9 (10.84%)          | 11 (13.25%) | 83    |
| 65-70 years old                                                         | 17 (26.56%) | 4 (6.25%)           | 16 (25.00%) | 12 (18.75%)         | 15 (23.44%) | 64    |
| 71-92 years old                                                         | 23 (26.74%) | 6 (6.98%)           | 17 (19.77%) | 18 (20.93%)         | 22 (25.58%) | 86    |
| Primary                                                                 | 12 (38.71%) | 2 (6.45%)           | 5 (16.13%)  | 4 (12.90%)          | 8 (25.81%)  | 31    |
| Secondary                                                               | 47 (33.57%) | 17 (12.14%)         | 42 (30.00%) | 12 (8.57%)          | 22 (15.71%) | 140   |
| Higher                                                                  | 47 (31.13%) | 22 (14.57%)         | 43 (28.48%) | 25 (16.56%)         | 14 (9.27%)  | 151   |
| Basic vocational                                                        | 21 (25.93%) | 8 (9.88%)           | 24 (29.63%) | 15 (18.52%)         | 13 (16.05%) | 81    |

| <b>10. I believe medical students should always disclose the fact they are students.</b> |            |                     |             |                     |              |       |
|------------------------------------------------------------------------------------------|------------|---------------------|-------------|---------------------|--------------|-------|
| Answers                                                                                  | Negative   | Moderately negative | Neutral     | Moderately positive | Positive     | TOTAL |
| Woman                                                                                    | 15 (6.88%) | 4 (1.83%)           | 8 (3.67%)   | 70 (32.11%)         | 121 (55.50%) | 218   |
| Man                                                                                      | 14 (7.57%) | 7 (3.78%)           | 20 (10.81%) | 38 (20.54%)         | 106 (57.30%) | 185   |
| General, Minimally Invasive and Endocrine Surgery                                        | 8 (9.88%)  | 2 (2.47%)           | 8 (9.88%)   | 14 (17.28%)         | 49 (60.49%)  | 81    |
| Internal Medicine, Occupational Diseases and Hypertension                                | 8 (9.52%)  | 3 (3.57%)           | 7 (8.33%)   | 15 (17.86%)         | 51 (60.71%)  | 84    |
| Gynecology and Obstetrics                                                                | 2 (2.50%)  | 1 (1.25%)           | 1 (1.25%)   | 36 (45.00%)         | 40 (50.00%)  | 80    |
| Orthopedic and Traumatologic Surgery                                                     | 5 (6.41%)  | 2 (2.56%)           | 5 (6.41%)   | 24 (30.77%)         | 42 (53.85%)  | 78    |
| Urology and Oncologic Urology                                                            | 6 (7.50%)  | 3 (3.75%)           | 7 (8.75%)   | 19 (23.75%)         | 45 (56.25%)  | 80    |
| 18-35 years old                                                                          | 7 (8.64%)  | 2 (2.47%)           | 9 (11.11%)  | 38 (46.91%)         | 25 (30.86%)  | 81    |
| 36-49 years old                                                                          | 3 (3.37%)  | 3 (3.37%)           | 5 (5.62%)   | 29 (32.58%)         | 49 (55.06%)  | 89    |
| 50-64 years old                                                                          | 6 (7.23%)  | 0 (0.00%)           | 9 (10.84%)  | 21 (25.30%)         | 47 (56.63%)  | 83    |
| 65-70 years old                                                                          | 6 (9.38%)  | 4 (6.25%)           | 0 (0.00%)   | 10 (15.63%)         | 44 (69.75%)  | 64    |
| 71-92 years old                                                                          | 7 (8.14%)  | 2 (2.33%)           | 5 (5.81%)   | 10 (11.63%)         | 62 (72.09%)  | 86    |
| Primary                                                                                  | 1 (3.23%)  | 2 (6.45%)           | 2 (6.45%)   | 6 (19.35%)          | 20 (64.52%)  | 31    |
| Secondary                                                                                | 9 (6.43%)  | 5 (3.57%)           | 10 (7.14%)  | 34 (24.29%)         | 82 (58.57%)  | 140   |
| Higher                                                                                   | 10 (6.62%) | 2 (1.32%)           | 7 (4.64%)   | 52 (34.44%)         | 80 (52.98%)  | 151   |
| Basic vocational                                                                         | 9 (11.11%) | 2 (2.47%)           | 9 (11.11%)  | 16 (19.75%)         | 45 (55.56%)  | 81    |

| <b>11. I believe medical students too often tend to use incomprehensible medical jargon.</b> |             |                     |             |                     |             |       |
|----------------------------------------------------------------------------------------------|-------------|---------------------|-------------|---------------------|-------------|-------|
| Answers                                                                                      | Negative    | Moderately negative | Neutral     | Moderately positive | Positive    | TOTAL |
| Woman                                                                                        | 58 (26.61%) | 51 (23.39%)         | 63 (28.90%) | 27 (12.39%)         | 19 (8.72%)  | 218   |
| Man                                                                                          | 43 (23.24%) | 32 (17.30%)         | 82 (44.32%) | 18 (9.73%)          | 10 (5.41%)  | 185   |
| General, Minimally Invasive and Endocrine Surgery                                            | 19 (23.46%) | 15 (18.52%)         | 32 (39.51%) | 8 (9.88%)           | 7 (8.64%)   | 81    |
| Internal Medicine, Occupational Diseases and Hypertension                                    | 22 (26.19%) | 20 (23.81%)         | 25 (29.76%) | 11 (13.10%)         | 6 (7.14%)   | 84    |
| Gynecology and Obstetrics                                                                    | 15 (18.75%) | 28 (35.00%)         | 25 (31.25%) | 8 (10.00%)          | 4 (5.00%)   | 80    |
| Orthopedic and Traumatologic Surgery                                                         | 23 (29.49%) | 10 (12.82%)         | 25 (32.05%) | 13 (16.67%)         | 7 (8.97%)   | 78    |
| Urology and Oncologic Urology                                                                | 22 (27.50%) | 10 (12.50%)         | 38 (47.50%) | 5 (6.25%)           | 5 (6.25%)   | 80    |
| 18-35 years old                                                                              | 22 (27.16%) | 20 (24.69%)         | 34 (41.98%) | 5 (6.17%)           | 0 (0.00%)   | 81    |
| 36-49 years old                                                                              | 19 (21.35%) | 28 (31.46%)         | 31 (34.83%) | 7 (7.87%)           | 4 (4.49%)   | 89    |
| 50-64 years old                                                                              | 19 (22.89%) | 15 (18.07%)         | 33 (39.76%) | 10 (12.05%)         | 6 (7.23%)   | 83    |
| 65-70 years old                                                                              | 19 (29.69%) | 10 (15.63%)         | 15 (23.44%) | 11 (17.19%)         | 9 (14.06%)  | 64    |
| 71-92 years old                                                                              | 22 (25.58%) | 10 (11.63%)         | 32 (37.21%) | 12 (13.95%)         | 10 (11.63%) | 86    |
| Primary                                                                                      | 8 (25.81%)  | 4 (12.90%)          | 13 (41.94%) | 5 (16.13%)          | 1 (3.23%)   | 31    |
| Secondary                                                                                    | 38 (27.14%) | 27 (19.29%)         | 46 (32.86%) | 12 (8.57%)          | 17 (12.14%) | 140   |
| Higher                                                                                       | 36 (23.84%) | 41 (27.15%)         | 54 (35.76%) | 17 (11.26%)         | 3 (1.99%)   | 151   |
| Basic vocational                                                                             | 19 (23.46%) | 11 (13.58%)         | 32 (39.51%) | 11 (13.58%)         | 8 (9.88%)   | 81    |

| <b>12. I believe medical students use overly colloquial language.</b> |             |                     |             |                     |             |       |
|-----------------------------------------------------------------------|-------------|---------------------|-------------|---------------------|-------------|-------|
| Answers                                                               | Negative    | Moderately negative | Neutral     | Moderately positive | Positive    | TOTAL |
| Woman                                                                 | 63 (28.90%) | 54 (24.77%)         | 71 (32.57%) | 12 (5.50%)          | 18 (8.26%)  | 218   |
| Man                                                                   | 52 (28.11%) | 29 (15.68%)         | 76 (41.08%) | 14 (7.57%)          | 14 (7.57%)  | 185   |
| General, Minimally Invasive and Endocrine Surgery                     | 20 (24.69%) | 17 (20.99%)         | 29 (35.80%) | 5 (6.17%)           | 10 (12.35%) | 81    |
| Internal Medicine, Occupational Diseases and Hypertension             | 23 (27.38%) | 18 (21.43%)         | 28 (33.33%) | 8 (9.52%)           | 7 (8.33%)   | 84    |
| Gynecology and Obstetrics                                             | 18 (22.50%) | 26 (32.50%)         | 30 (37.50%) | 2 (2.50%)           | 4 (5.00%)   | 80    |
| Orthopedic and Traumatologic Surgery                                  | 27 (34.62%) | 15 (19.23%)         | 28 (35.90%) | 3 (3.85%)           | 5 (6.41%)   | 78    |
| Urology and Oncologic Urology                                         | 27 (33.75%) | 7 (8.75%)           | 32 (40.00%) | 8 (10.00%)          | 6 (7.50%)   | 80    |
| 18-35 years old                                                       | 27 (33.33%) | 25 (30.86%)         | 29 (35.80%) | 0 (0.00%)           | 0 (0.00%)   | 81    |
| 36-49 years old                                                       | 17 (19.10%) | 28 (31.46%)         | 34 (38.20%) | 3 (3.37%)           | 7 (7.87%)   | 89    |
| 50-64 years old                                                       | 26 (31.33%) | 13 (15.66%)         | 31 (37.35%) | 7 (8.43%)           | 6 (7.23%)   | 83    |
| 65-70 years old                                                       | 21 (32.81%) | 9 (14.06%)          | 22 (34.38%) | 4 (6.25%)           | 8 (12.50%)  | 64    |
| 71-92 years old                                                       | 24 (27.91%) | 8 (9.30%)           | 31 (36.05%) | 12 (13.95%)         | 11 (12.79%) | 86    |
| Primary                                                               | 10 (32.26%) | 5 (16.13%)          | 10 (32.26%) | 2 (6.45%)           | 4 (12.90%)  | 31    |
| Secondary                                                             | 41 (29.29%) | 30 (21.43%)         | 41 (29.29%) | 12 (8.57%)          | 16 (11.43%) | 140   |
| Higher                                                                | 38 (25.17%) | 44 (29.14%)         | 59 (39.07%) | 5 (3.31%)           | 5 (3.31%)   | 151   |
| Basic vocational                                                      | 26 (32.10%) | 4 (4.94%)           | 37 (45.68%) | 7 (8.64%)           | 7 (8.64%)   | 81    |



| <b>13. I would prefer medical students to volunteer to perform examinations more frequently.</b> |            |                     |              |                     |             |       |
|--------------------------------------------------------------------------------------------------|------------|---------------------|--------------|---------------------|-------------|-------|
| Answers                                                                                          | Negative   | Moderately negative | Neutral      | Moderately positive | Positive    | TOTAL |
| Woman                                                                                            | 17 (7.80%) | 23 (10.55%)         | 102 (46.79%) | 34 (15.60%)         | 42 (19.27%) | 218   |
| Man                                                                                              | 12 (6.49%) | 17 (9.19%)          | 68 (36.76%)  | 40 (21.62%)         | 48 (25.95%) | 185   |
| General, Minimally Invasive and Endocrine Surgery                                                | 7 (8.64%)  | 7 (8.64%)           | 30 (37.04%)  | 17 (20.99%)         | 20 (24.69%) | 81    |
| Internal Medicine, Occupational Diseases and Hypertension                                        | 5 (5.95%)  | 12 (14.29%)         | 32 (38.10%)  | 16 (19.05%)         | 19 (22.62%) | 84    |
| Gynecology and Obstetrics                                                                        | 5 (6.25%)  | 12 (15.00%)         | 53 (66.25%)  | 7 (8.75%)           | 3 (3.75%)   | 80    |
| Orthopedic and Traumatologic Surgery                                                             | 7 (8.97%)  | 3 (3.85%)           | 31 (39.74%)  | 16 (20.51%)         | 21 (26.92%) | 78    |
| Urology and Oncologic Urology                                                                    | 5 (6.25%)  | 6 (7.50%)           | 24 (30.00%)  | 18 (22.50%)         | 27 (33.75%) | 80    |
| 18-35 years old                                                                                  | 5 (6.17%)  | 6 (7.41%)           | 53 (65.43%)  | 10 (12.35%)         | 7 (8.64%)   | 81    |
| 36-49 years old                                                                                  | 7 (7.87%)  | 16 (17.98%)         | 42 (47.19%)  | 15 (16.85%)         | 9 (10.11%)  | 89    |
| 50-64 years old                                                                                  | 5 (6.02%)  | 8 (9.64%)           | 36 (43.37%)  | 15 (18.07%)         | 19 (22.89%) | 83    |
| 65-70 years old                                                                                  | 5 (7.81%)  | 5 (7.81%)           | 17 (26.56%)  | 16 (25.00%)         | 21 (32.81%) | 64    |
| 71-92 years old                                                                                  | 7 (8.14%)  | 5 (5.81%)           | 22 (25.58%)  | 18 (20.93%)         | 34 (39.53%) | 86    |
| Primary                                                                                          | 2 (6.45%)  | 1 (3.23%)           | 6 (19.35%)   | 9 (29.03%)          | 13 (41.94%) | 31    |
| Secondary                                                                                        | 8 (5.71%)  | 19 (13.57%)         | 58 (41.43%)  | 21 (15.00%)         | 34 (24.29%) | 140   |
| Higher                                                                                           | 10 (6.62%) | 17 (11.26%)         | 75 (49.67%)  | 30 (19.87%)         | 19 (12.58%) | 151   |
| Basic vocational                                                                                 | 9 (11.11%) | 3 (3.70%)           | 31 (38.27%)  | 14 (17.28%)         | 24 (29.63%) | 81    |

| <b>14. I feel medical students do not care about patients' privacy during medical classes.</b> |             |                     |             |                     |            |       |
|------------------------------------------------------------------------------------------------|-------------|---------------------|-------------|---------------------|------------|-------|
| Answers                                                                                        | Negative    | Moderately negative | Neutral     | Moderately positive | Positive   | TOTAL |
| Woman                                                                                          | 42 (19.27%) | 41 (18.81%)         | 85 (38.99%) | 32 (14.68%)         | 18 (8.26%) | 218   |
| Man                                                                                            | 37 (20.00%) | 33 (17.84%)         | 82 (44.32%) | 21 (11.35%)         | 12 (6.49%) | 185   |
| General, Minimally Invasive and Endocrine Surgery                                              | 14 (17.28%) | 19 (23.46%)         | 28 (34.57%) | 14 (17.28%)         | 6 (7.41%)  | 81    |
| Internal Medicine, Occupational Diseases and Hypertension                                      | 21 (25.00%) | 14 (16.67%)         | 34 (40.48%) | 8 (9.52%)           | 7 (8.33%)  | 84    |
| Gynecology and Obstetrics                                                                      | 10 (12.50%) | 22 (27.50%)         | 34 (42.50%) | 12 (15.00%)         | 2 (2.50%)  | 80    |
| Orthopedic and Traumatologic Surgery                                                           | 19 (24.36%) | 13 (16.67%)         | 27 (34.62%) | 11 (14.10%)         | 8 (10.26%) | 78    |
| Urology and Oncologic Urology                                                                  | 15 (18.75%) | 6 (7.50%)           | 44 (55.00%) | 8 (10.00%)          | 7 (8.75%)  | 80    |
| 18-35 years old                                                                                | 16 (19.75%) | 22 (27.16%)         | 30 (37.04%) | 12 (14.81%)         | 1 (1.23%)  | 81    |
| 36-49 years old                                                                                | 12 (13.48%) | 21 (23.60%)         | 40 (44.94%) | 10 (11.24%)         | 6 (6.74%)  | 89    |
| 50-64 years old                                                                                | 18 (21.69%) | 14 (16.87%)         | 36 (43.37%) | 8 (9.64%)           | 7 (8.43%)  | 83    |
| 65-70 years old                                                                                | 13 (20.31%) | 11 (17.19%)         | 20 (31.35%) | 12 (18.75%)         | 8 (12.50%) | 64    |
| 71-92 years old                                                                                | 20 (23.26%) | 6 (6.98%)           | 41 (47.67%) | 11 (12.79%)         | 8 (9.30%)  | 86    |
| Primary                                                                                        | 7 (22.58%)  | 2 (6.45%)           | 11 (35.48%) | 8 (25.81%)          | 3 (9.68%)  | 31    |
| Secondary                                                                                      | 28 (20.00%) | 26 (18.57%)         | 62 (44.27%) | 13 (9.29%)          | 11 (7.86%) | 140   |
| Higher                                                                                         | 26 (17.22%) | 39 (25.83%)         | 57 (37.75%) | 22 (14.57%)         | 7 (4.64%)  | 151   |
| Basic vocational                                                                               | 18 (22.22%) | 7 (8.64%)           | 37 (45.68%) | 10 (12.35%)         | 9 (11.11%) | 81    |

| <b>15. I care if the physician asks whether I am willing to participate in clinical classes.</b> |             |                     |             |                     |              |       |
|--------------------------------------------------------------------------------------------------|-------------|---------------------|-------------|---------------------|--------------|-------|
| Answers                                                                                          | Negative    | Moderately negative | Neutral     | Moderately positive | Positive     | TOTAL |
| Woman                                                                                            | 15 (6.88%)  | 6 (2.75%)           | 27 (12.39%) | 51 (23.39%)         | 119 (54.59%) | 218   |
| Man                                                                                              | 18 (9.73%)  | 9 (4.86%)           | 24 (12.97%) | 47 (25.41%)         | 87 (47.03%)  | 185   |
| General, Minimally Invasive and Endocrine Surgery                                                | 6 (7.41%)   | 4 (4.94%)           | 21 (25.93%) | 17 (20.99%)         | 33 (40.74%)  | 81    |
| Internal Medicine, Occupational Diseases and Hypertension                                        | 4 (4.76%)   | 4 (4.76%)           | 5 (5.95%)   | 20 (23.81%)         | 51 (60.71%)  | 84    |
| Gynecology and Obstetrics                                                                        | 0 (0.00%)   | 3 (3.75%)           | 10 (12.50%) | 22 (27.50%)         | 45 (56.25%)  | 80    |
| Orthopedic and Traumatologic Surgery                                                             | 10 (12.82%) | 0 (0.00%)           | 7 (8.97%)   | 19 (24.36%)         | 42 (53.85%)  | 78    |
| Urology and Oncologic Urology                                                                    | 13 (16.25%) | 4 (5.00%)           | 8 (10.00%)  | 20 (25.00%)         | 35 (43.75%)  | 80    |
| 18-35 years old                                                                                  | 7 (8.64%)   | 2 (2.47%)           | 17 (20.99%) | 24 (29.63%)         | 31 (38.27%)  | 81    |
| 36-49 years old                                                                                  | 2 (2.25%)   | 6 (6.74%)           | 6 (6.74%)   | 27 (30.34%)         | 48 (53.93%)  | 89    |
| 50-64 years old                                                                                  | 4 (4.82%)   | 3 (3.61%)           | 12 (14.46%) | 13 (15.66%)         | 51 (61.45%)  | 83    |
| 65-70 years old                                                                                  | 6 (9.38%)   | 3 (4.69%)           | 4 (6.25%)   | 14 (21.88%)         | 37 (57.81%)  | 64    |
| 71-92 years old                                                                                  | 14 (16.28%) | 1 (1.16%)           | 12 (13.95%) | 20 (23.26%)         | 39 (45.35%)  | 86    |
| Primary                                                                                          | 3 (9.68%)   | 0 (0.00%)           | 1 (3.23%)   | 6 (19.35%)          | 21 (67.74%)  | 31    |
| Secondary                                                                                        | 12 (8.57%)  | 7 (5.00%)           | 18 (12.86%) | 27 (19.29%)         | 76 (54.29%)  | 140   |
| Higher                                                                                           | 12 (7.95%)  | 3 (1.99%)           | 13 (8.61%)  | 49 (32.45%)         | 74 (49.01%)  | 151   |
| Basic vocational                                                                                 | 6 (7.41%)   | 5 (6.17%)           | 19 (23.46%) | 16 (19.75%)         | 35 (43.21%)  | 81    |

| <b>16. I judge medical students on the grounds of their approach to the physician conducting clinical classes.</b> |             |                     |             |                     |             |       |
|--------------------------------------------------------------------------------------------------------------------|-------------|---------------------|-------------|---------------------|-------------|-------|
| Answers                                                                                                            | Negative    | Moderately negative | Neutral     | Moderately positive | Positive    | TOTAL |
| Woman                                                                                                              | 24 (11.01%) | 17 (7.80%)          | 82 (37.61%) | 44 (20.18%)         | 51 (23.39%) | 218   |
| Man                                                                                                                | 18 (9.73%)  | 10 (5.41%)          | 59 (31.89%) | 46 (24.86%)         | 52 (28.11%) | 185   |
| General, Minimally Invasive and Endocrine Surgery                                                                  | 8 (9.88%)   | 6 (7.41%)           | 27 (33.33%) | 11 (13.58%)         | 29 (35.80%) | 81    |
| Internal Medicine, Occupational Diseases and Hypertension                                                          | 8 (9.52%)   | 3 (3.57%)           | 31 (36.90%) | 17 (20.24%)         | 25 (29.76%) | 84    |
| Gynecology and Obstetrics                                                                                          | 7 (8.75%)   | 9 (11.25%)          | 31 (38.75%) | 28 (35.00%)         | 5 (6.25%)   | 80    |
| Orthopedic and Traumatologic Surgery                                                                               | 13 (16.67%) | 4 (5.13%)           | 27 (34.62%) | 18 (23.08%)         | 16 (20.51%) | 78    |
| Urology and Oncologic Urology                                                                                      | 6 (7.50%)   | 5 (6.25%)           | 25 (31.25%) | 16 (20.00%)         | 28 (35.00%) | 80    |
| 18-35 years old                                                                                                    | 11 (13.58%) | 11 (13.58%)         | 25 (30.86%) | 24 (29.63%)         | 10 (12.35%) | 81    |
| 36-49 years old                                                                                                    | 9 (10.11%)  | 7 (7.87%)           | 40 (44.94%) | 23 (25.84%)         | 10 (11.24%) | 89    |
| 50-64 years old                                                                                                    | 12 (14.46%) | 5 (6.02%)           | 30 (36.14%) | 17 (20.48%)         | 19 (22.89%) | 83    |
| 65-70 years old                                                                                                    | 3 (4.69%)   | 2 (3.13%)           | 20 (31.25%) | 13 (20.31%)         | 26 (40.63%) | 64    |
| 71-92 years old                                                                                                    | 7 (8.14%)   | 2 (2.33%)           | 26 (30.23%) | 13 (15.12%)         | 38 (44.19%) | 86    |
| Primary                                                                                                            | 3 (9.68%)   | 1 (3.23%)           | 13 (41.94%) | 4 (12.90%)          | 10 (32.26%) | 31    |
| Secondary                                                                                                          | 14 (10.00%) | 11 (7.86%)          | 49 (35.00%) | 25 (17.86%)         | 41 (29.29%) | 140   |
| Higher                                                                                                             | 17 (11.26%) | 14 (9.27%)          | 56 (37.09%) | 43 (28.48%)         | 21 (13.91%) | 151   |
| Basic vocational                                                                                                   | 8 (9.88%)   | 1 (1.23%)           | 23 (28.40%) | 18 (22.22%)         | 31 (38.27%) | 81    |

| <b>17. I feel uncomfortable when a physician leaves me alone with medical students.</b> |             |                     |             |                     |             |       |
|-----------------------------------------------------------------------------------------|-------------|---------------------|-------------|---------------------|-------------|-------|
| Answers                                                                                 | Negative    | Moderately negative | Neutral     | Moderately positive | Positive    | TOTAL |
| Woman                                                                                   | 63 (28.90%) | 30 (13.76%)         | 53 (24.31%) | 36 (16.51%)         | 36 (16.51%) | 218   |
| Man                                                                                     | 67 (36.22%) | 33 (17.84%)         | 53 (28.65%) | 11 (5.95%)          | 21 (11.35%) | 185   |
| General, Minimally Invasive and Endocrine Surgery                                       | 23 (28.40%) | 18 (22.22%)         | 21 (25.93%) | 7 (8.64%)           | 12 (14.81%) | 81    |
| Internal Medicine, Occupational Diseases and Hypertension                               | 27 (32.14%) | 13 (15.48%)         | 20 (23.81%) | 10 (11.90%)         | 14 (16.67%) | 84    |
| Gynecology and Obstetrics                                                               | 15 (18.75%) | 15 (18.75%)         | 27 (33.75%) | 15 (18.75%)         | 8 (10.00%)  | 80    |
| Orthopedic and Traumatologic Surgery                                                    | 34 (43.59%) | 8 (10.26%)          | 20 (25.64%) | 7 (8.97%)           | 9 (11.54%)  | 78    |
| Urology and Oncologic Urology                                                           | 31 (38.75%) | 9 (11.25%)          | 18 (22.50%) | 8 (10.00%)          | 14 (17.50%) | 80    |
| 18-35 years old                                                                         | 27 (33.33%) | 15 (18.52%)         | 24 (29.63%) | 13 (16.05%)         | 2 (2.47%)   | 81    |
| 36-49 years old                                                                         | 24 (26.97%) | 22 (24.72%)         | 22 (24.72%) | 12 (13.48%)         | 9 (10.11%)  | 89    |
| 50-64 years old                                                                         | 22 (26.51%) | 14 (16.87%)         | 28 (33.73%) | 6 (7.23%)           | 13 (15.66%) | 83    |
| 65-70 years old                                                                         | 23 (35.94%) | 8 (12.50%)          | 13 (20.31%) | 8 (12.50%)          | 12 (18.75%) | 64    |
| 71-92 years old                                                                         | 34 (39.53%) | 4 (4.65%)           | 19 (22.09%) | 8 (9.30%)           | 21 (24.42%) | 86    |
| Primary                                                                                 | 13 (41.94%) | 2 (6.45%)           | 6 (19.35%)  | 4 (12.90%)          | 6 (19.35%)  | 31    |
| Secondary                                                                               | 43 (30.71%) | 20 (14.29%)         | 38 (27.14%) | 17 (12.14%)         | 22 (15.71%) | 140   |
| Higher                                                                                  | 48 (31.79%) | 29 (19.21%)         | 42 (27.81%) | 16 (10.60%)         | 16 (10.60%) | 151   |
| Basic vocational                                                                        | 26 (32.10%) | 12 (14.18%)         | 20 (24.69%) | 10 (12.35%)         | 13 (16.05%) | 81    |

| <b>18. I gladly participate in clinical classes before my procedure.</b> |             |                     |             |                     |             |       |
|--------------------------------------------------------------------------|-------------|---------------------|-------------|---------------------|-------------|-------|
| Answers                                                                  | Negative    | Moderately negative | Neutral     | Moderately positive | Positive    | TOTAL |
| Woman                                                                    | 20 (9.17%)  | 9 (4.13%)           | 62 (28.44%) | 55 (25.23%)         | 72 (33.03%) | 218   |
| Man                                                                      | 9 (4.86%)   | 12 (6.49%)          | 49 (26.49%) | 50 (27.03%)         | 65 (35.14%) | 185   |
| General, Minimally Invasive and Endocrine Surgery                        | 10 (12.35%) | 5 (6.17%)           | 18 (22.22%) | 23 (28.40%)         | 25 (30.86%) | 81    |
| Internal Medicine, Occupational Diseases and Hypertension                | 6 (7.14%)   | 4 (4.76%)           | 25 (29.76%) | 10 (23.81%)         | 29 (34.52%) | 84    |
| Gynecology and Obstetrics                                                | 6 (7.50%)   | 5 (6.25%)           | 31 (38.75%) | 25 (31.25%)         | 13 (16.25%) | 80    |
| Orthopedic and Traumatologic Surgery                                     | 4 (5.13%)   | 5 (6.41%)           | 17 (21.79%) | 17 (21.79%)         | 35 (44.87%) | 78    |
| Urology and Oncologic Urology                                            | 3 (3.75%)   | 2 (2.50%)           | 20 (25.00%) | 20 (25.00%)         | 35 (43.75%) | 80    |
| 18-35 years old                                                          | 2 (2.47%)   | 2 (2.47%)           | 33 (40.74%) | 25 (30.86%)         | 19 (23.46%) | 81    |
| 36-49 years old                                                          | 8 (8.99%)   | 8 (8.99%)           | 21 (23.60%) | 32 (35.96%)         | 20 (22.47%) | 89    |
| 50-64 years old                                                          | 3 (3.61%)   | 5 (6.02%)           | 25 (30.12%) | 22 (26.51%)         | 28 (33.73%) | 83    |
| 65-70 years old                                                          | 6 (9.38%)   | 2 (3.13%)           | 15 (23.44%) | 12 (18.75%)         | 29 (45.31%) | 64    |
| 71-92 years old                                                          | 10 (11.63%) | 4 (4.65%)           | 17 (19.77%) | 14 (16.28%)         | 41 (47.67%) | 86    |
| Primary                                                                  | 4 (12.90%)  | 1 (3.23%)           | 4 (12.90%)  | 5 (16.13%)          | 17 (54.84%) | 31    |
| Secondary                                                                | 8 (5.71%)   | 6 (4.29%)           | 38 (27.14%) | 31 (22.14%)         | 57 (40.71%) | 140   |
| Higher                                                                   | 12 (7.95%)  | 9 (5.96%)           | 45 (29.80%) | 47 (31.13%)         | 38 (25.17%) | 151   |
| Basic vocational                                                         | 5 (6.17%)   | 5 (6.17%)           | 24 (29.63%) | 22 (27.16%)         | 25 (30.86%) | 81    |

| <b>19. I gladly participate in clinical classes after my procedure.</b> |             |                     |             |                     |             |       |
|-------------------------------------------------------------------------|-------------|---------------------|-------------|---------------------|-------------|-------|
| Answers                                                                 | Negative    | Moderately negative | Neutral     | Moderately positive | Positive    | TOTAL |
| Woman                                                                   | 18 (8.26%)  | 19 (8.72%)          | 53 (24.31%) | 54 (24.77%)         | 74 (33.94%) | 218   |
| Man                                                                     | 20 (10.81%) | 10 (5.41%)          | 50 (27.03%) | 49 (26.49%)         | 56 (30.27%) | 185   |
| General, Minimally Invasive and Endocrine Surgery                       | 12 (14.81%) | 7 (8.64%)           | 18 (22.22%) | 15 (18.52%)         | 29 (35.80%) | 81    |
| Internal Medicine, Occupational Diseases and Hypertension               | 16 (19.05%) | 7 (8.33%)           | 22 (26.19%) | 17 (20.24%)         | 22 (26.19%) | 84    |
| Gynecology and Obstetrics                                               | 3 (3.75%)   | 8 (10.00%)          | 26 (32.50%) | 31 (38.75%)         | 12 (15.00%) | 80    |
| Orthopedic and Traumatologic Surgery                                    | 5 (6.41%)   | 4 (5.13%)           | 18 (23.08%) | 19 (24.36%)         | 32 (41.03%) | 78    |
| Urology and Oncologic Urology                                           | 2 (2.50%)   | 2 (3.75%)           | 19 (23.75%) | 21 (26.25%)         | 35 (43.75%) | 80    |
| 18-35 years old                                                         | 4 (4.94%)   | 6 (7.41%)           | 29 (35.80%) | 26 (32.10%)         | 16 (19.75%) | 81    |
| 36-49 years old                                                         | 11 (12.36%) | 7 (7.87%)           | 20 (22.47%) | 31 (34.83%)         | 20 (22.47%) | 89    |
| 50-64 years old                                                         | 10 (12.05%) | 5 (6.02%)           | 25 (30.12%) | 23 (27.71%)         | 20 (24.10%) | 83    |
| 65-70 years old                                                         | 5 (7.81%)   | 3 (4.69%)           | 12 (18.75%) | 12 (18.75%)         | 32 (50.00%) | 64    |
| 71-92 years old                                                         | 8 (9.30%)   | 8 (9.30%)           | 17 (19.77%) | 11 (12.79%)         | 42 (48.84%) | 86    |
| Primary                                                                 | 2 (6.45%)   | 3 (9.68%)           | 3 (9.68%)   | 5 (16.13%)          | 18 (58.06%) | 31    |
| Secondary                                                               | 11 (7.86%)  | 9 (6.43%)           | 37 (26.43%) | 30 (21.43%)         | 53 (37.86%) | 140   |
| Higher                                                                  | 16 (10.60%) | 12 (7.95%)          | 42 (27.81%) | 49 (32.45%)         | 32 (21.19%) | 151   |
| Basic vocational                                                        | 9 (11.11%)  | 5 (6.17%)           | 21 (25.93%) | 19 (23.46%)         | 27 (33.33%) | 81    |

| <b>20. I would prefer medical students to ask for my consent prior to performing an examination</b> |             |                     |             |                     |              |       |
|-----------------------------------------------------------------------------------------------------|-------------|---------------------|-------------|---------------------|--------------|-------|
| Answers                                                                                             | Negative    | Moderately negative | Neutral     | Moderately positive | Positive     | TOTAL |
| Woman                                                                                               | 10 (4.59%)  | 4 (1.83%)           | 16 (7.34%)  | 51 (23.39%)         | 137 (62.84%) | 218   |
| Man                                                                                                 | 15 (8.11%)  | 11 (5.95%)          | 19 (10.27%) | 35 (18.92%)         | 105 (56.76%) | 185   |
| General, Minimally Invasive and Endocrine Surgery                                                   | 5 (6.17%)   | 5 (6.17%)           | 15 (18.52%) | 13 (16.05%)         | 43 (53.09%)  | 81    |
| Internal Medicine, Occupational Diseases and Hypertension                                           | 4 (4.76%)   | 2 (2.38%)           | 5 (5.95%)   | 14 (16.67%)         | 59 (70.24%)  | 84    |
| Gynecology and Obstetrics                                                                           | 1 (1.25%)   | 1 (1.25%)           | 4 (5.00%)   | 27 (33.75%)         | 47 (58.75%)  | 80    |
| Orthopedic and Traumatologic Surgery                                                                | 8 (10.26%)  | 2 (2.56%)           | 5 (6.41%)   | 20 (25.64%)         | 43 (55.13%)  | 78    |
| Urology and Oncologic Urology                                                                       | 7 (8.75%)   | 5 (6.25%)           | 6 (7.50%)   | 12 (15.00%)         | 50 (62.50%)  | 80    |
| 18-35 years old                                                                                     | 7 (8.64%)   | 1 (1.23%)           | 8 (9.88%)   | 29 (35.80%)         | 36 (44.44%)  | 81    |
| 36-49 years old                                                                                     | 1 (1.12%)   | 1 (1.12%)           | 7 (7.87%)   | 22 (24.72%)         | 58 (65.17%)  | 89    |
| 50-64 years old                                                                                     | 6 (7.23%)   | 3 (3.61%)           | 8 (9.64%)   | 15 (18.07%)         | 51 (61.45%)  | 83    |
| 65-70 years old                                                                                     | 1 (1.56%)   | 7 (10.94%)          | 6 (9.38%)   | 10 (15.63%)         | 40 (62.50%)  | 64    |
| 71-92 years old                                                                                     | 10 (11.63%) | 3 (3.49%)           | 6 (6.98%)   | 10 (11.63%)         | 57 (66.28%)  | 86    |
| Primary                                                                                             | 2 (6.45%)   | 0 (0.00%)           | 5 (16.13%)  | 3 (9.68%)           | 21 (67.74%)  | 31    |
| Secondary                                                                                           | 9 (6.43%)   | 6 (4.29%)           | 7 (5.00%)   | 27 (19.29%)         | 91 (65.00%)  | 140   |
| Higher                                                                                              | 6 (3.97%)   | 2 (1.32%)           | 11 (7.28%)  | 42 (27.81%)         | 90 (59.60%)  | 151   |
| Basic vocational                                                                                    | 8 (9.88%)   | 7 (8.64%)           | 12 (14.81%) | 14 (17.28%)         | 40 (49.38%)  | 81    |

| <b>21. I believe my involvement is needed for medical students to become good healthcare professionals.</b> |           |                     |             |                     |              |       |
|-------------------------------------------------------------------------------------------------------------|-----------|---------------------|-------------|---------------------|--------------|-------|
| Answers                                                                                                     | Negative  | Moderately negative | Neutral     | Moderately positive | Positive     | TOTAL |
| Woman                                                                                                       | 8 (3.67%) | 5 (2.29%)           | 23 (10.55%) | 46 (21.10%)         | 136 (62.39%) | 218   |
| Man                                                                                                         | 5 (2.70%) | 2 (1.08%)           | 24 (12.97%) | 31 (16.76%)         | 123 (66.49%) | 185   |
| General, Minimally Invasive and Endocrine Surgery                                                           | 7 (8.64%) | 1 (1.23%)           | 8 (9.88%)   | 8 (9.88%)           | 57 (70.37%)  | 81    |
| Internal Medicine, Occupational Diseases and Hypertension                                                   | 3 (3.57%) | 2 (2.38%)           | 12 (14.29%) | 11 (13.10%)         | 56 (66.67%)  | 84    |
| Gynecology and Obstetrics                                                                                   | 0 (0.00%) | 3 (3.75%)           | 11 (13.75%) | 31 (38.75%)         | 35 (43.75%)  | 80    |
| Orthopedic and Traumatologic Surgery                                                                        | 2 (2.56%) | 1 (1.28%)           | 8 (10.26%)  | 15 (19.23%)         | 52 (66.67%)  | 78    |
| Urology and Oncologic Urology                                                                               | 1 (1.25%) | 0 (0.00%)           | 8 (10.00%)  | 12 (15.00%)         | 59 (73.75%)  | 80    |
| 18-35 years old                                                                                             | 4 (4.94%) | 2 (2.47%)           | 15 (18.52%) | 23 (28.40%)         | 37 (45.68%)  | 81    |
| 36-49 years old                                                                                             | 1 (1.12%) | 2 (2.25%)           | 11 (12.36%) | 24 (26.97%)         | 51 (57.30%)  | 89    |
| 50-64 years old                                                                                             | 3 (3.61%) | 2 (2.41%)           | 10 (12.05%) | 12 (14.46%)         | 56 (67.47%)  | 83    |
| 65-70 years old                                                                                             | 2 (3.13%) | 0 (0.00%)           | 4 (6.25%)   | 10 (15.63%)         | 48 (75.00%)  | 64    |
| 71-92 years old                                                                                             | 3 (3.49%) | 1 (1.16%)           | 7 (8.14%)   | 8 (9.30%)           | 67 (77.91%)  | 86    |
| Primary                                                                                                     | 0 (0.00%) | 0 (0.00%)           | 5 (16.13%)  | 1 (3.23%)           | 25 (80.65%)  | 31    |
| Secondary                                                                                                   | 5 (3.57%) | 4 (2.86%)           | 12 (8.57%)  | 19 (13.57%)         | 100 (71.43%) | 140   |
| Higher                                                                                                      | 3 (1.99%) | 3 (1.99%)           | 15 (9.93%)  | 45 (29.80%)         | 85 (56.29%)  | 151   |
| Basic vocational                                                                                            | 5 (6.17%) | 0 (0.00%)           | 15 (18.52%) | 12 (14.81%)         | 49 (60.49%)  | 81    |

| <b>22. I value medical students recalling our previous conversations.</b> |            |                     |             |                     |              |       |
|---------------------------------------------------------------------------|------------|---------------------|-------------|---------------------|--------------|-------|
| Answers                                                                   | Negative   | Moderately negative | Neutral     | Moderately positive | Positive     | TOTAL |
| Woman                                                                     | 11 (5.05%) | 7 (3.21%)           | 35 (16.06%) | 64 (29.36%)         | 101 (46.33%) | 218   |
| Man                                                                       | 11 (5.95%) | 11 (5.95%)          | 22 (11.89%) | 52 (28.11%)         | 89 (48.11%)  | 185   |
| General, Minimally Invasive and Endocrine Surgery                         | 4 (4.94%)  | 6 (7.41%)           | 13 (16.05%) | 19 (23.46%)         | 39 (38.15%)  | 81    |
| Internal Medicine, Occupational Diseases and Hypertension                 | 4 (4.76%)  | 5 (5.95%)           | 12 (14.29%) | 22 (26.19%)         | 41 (48.81%)  | 84    |
| Gynecology and Obstetrics                                                 | 1 (1.25%)  | 2 (2.50%)           | 12 (15.00%) | 35 (43.75%)         | 30 (37.50%)  | 80    |
| Orthopedic and Traumatologic Surgery                                      | 9 (11.54%) | 3 (3.85%)           | 11 (14.10%) | 23 (29.49%)         | 32 (41.03%)  | 78    |
| Urology and Oncologic Urology                                             | 4 (5.00%)  | 2 (2.50%)           | 9 (11.25%)  | 17 (21.25%)         | 48 (60.00%)  | 80    |
| 18-35 years old                                                           | 4 (4.94%)  | 4 (4.94%)           | 14 (17.28%) | 31 (38.27%)         | 28 (34.57%)  | 81    |
| 36-49 years old                                                           | 2 (2.25%)  | 5 (5.62%)           | 7 (7.87%)   | 34 (38.20%)         | 41 (46.07%)  | 89    |
| 50-64 years old                                                           | 5 (6.02%)  | 4 (4.82%)           | 12 (14.46%) | 19 (22.89%)         | 43 (51.81%)  | 83    |
| 65-70 years old                                                           | 5 (7.81%)  | 3 (4.69%)           | 10 (15.63%) | 13 (20.31%)         | 33 (51.56%)  | 64    |
| 71-92 years old                                                           | 6 (6.98%)  | 2 (2.33%)           | 14 (16.28%) | 19 (22.09%)         | 45 (52.33%)  | 86    |
| Primary                                                                   | 2 (6.45%)  | 2 (6.45%)           | 4 (12.90%)  | 5 (16.13%)          | 18 (58.06%)  | 31    |
| Secondary                                                                 | 9 (6.43%)  | 5 (3.57%)           | 20 (14.29%) | 35 (25.00%)         | 71 (50.71%)  | 140   |
| Higher                                                                    | 6 (3.97%)  | 6 (3.97%)           | 17 (11.26%) | 58 (38.41%)         | 64 (42.38%)  | 151   |
| Basic vocational                                                          | 5 (6.17%)  | 5 (6.17%)           | 16 (19.75%) | 18 (22.22%)         | 37 (45.68%)  | 81    |

| <b>23. I find conversations with medical students to be helpful in dealing with loneliness.</b> |             |                     |             |                     |             |       |
|-------------------------------------------------------------------------------------------------|-------------|---------------------|-------------|---------------------|-------------|-------|
| Answers                                                                                         | Negative    | Moderately negative | Neutral     | Moderately positive | Positive    | TOTAL |
| Woman                                                                                           | 19 (8.72%)  | 14 (6.42%)          | 71 (32.57%) | 50 (22.94%)         | 64 (29.36%) | 218   |
| Man                                                                                             | 17 (9.19%)  | 8 (4.32%)           | 54 (29.19%) | 28 (15.14%)         | 78 (42.16%) | 185   |
| General, Minimally Invasive and Endocrine Surgery                                               | 3 (3.70%)   | 6 (7.41%)           | 27 (33.33%) | 12 (14.81%)         | 33 (40.74%) | 81    |
| Internal Medicine, Occupational Diseases and Hypertension                                       | 11 (13.10%) | 5 (5.95%)           | 25 (29.76%) | 15 (17.86%)         | 28 (33.33%) | 84    |
| Gynecology and Obstetrics                                                                       | 4 (5.00%)   | 6 (7.50%)           | 34 (42.50%) | 20 (25.00%)         | 16 (20.00%) | 80    |
| Orthopedic and Traumatologic Surgery                                                            | 14 (17.95%) | 4 (5.13%)           | 20 (25.64%) | 14 (17.95%)         | 26 (33.33%) | 78    |
| Urology and Oncologic Urology                                                                   | 4 (5.00%)   | 1 (1.25%)           | 19 (23.75%) | 17 (21.25%)         | 39 (48.75%) | 80    |
| 18-35 years old                                                                                 | 6 (7.41%)   | 4 (4.94%)           | 39 (48.15%) | 15 (18.52%)         | 17 (20.99%) | 81    |
| 36-49 years old                                                                                 | 9 (10.11%)  | 11 (12.36%)         | 25 (28.09%) | 24 (26.97%)         | 20 (22.47%) | 89    |
| 50-64 years old                                                                                 | 9 (10.84%)  | 4 (4.82%)           | 31 (38.55%) | 13 (15.66%)         | 25 (30.12%) | 83    |
| 65-70 years old                                                                                 | 6 (9.38%)   | 1 (1.56%)           | 10 (15.63%) | 13 (20.31%)         | 34 (53.13%) | 64    |
| 71-92 years old                                                                                 | 6 (6.98%)   | 2 (2.33%)           | 19 (22.09%) | 13 (15.12%)         | 46 (53.49%) | 86    |
| Primary                                                                                         | 2 (6.45%)   | 3 (9.68%)           | 8 (25.81%)  | 4 (12.90%)          | 14 (45.16%) | 31    |
| Secondary                                                                                       | 15 (10.71%) | 6 (4.29%)           | 39 (27.86%) | 26 (18.57%)         | 54 (38.57%) | 140   |
| Higher                                                                                          | 12 (7.95%)  | 10 (6.62%)          | 60 (39.74%) | 32 (21.19%)         | 37 (24.50%) | 151   |
| Basic vocational                                                                                | 7 (8.64%)   | 3 (3.70%)           | 18 (22.22%) | 16 (19.75%)         | 37 (45.68%) | 81    |

| <b>24. I believe I partake in clinical classes too frequently.</b> |             |                     |             |                     |            |       |
|--------------------------------------------------------------------|-------------|---------------------|-------------|---------------------|------------|-------|
| Answers                                                            | Negative    | Moderately negative | Neutral     | Moderately positive | Positive   | TOTAL |
| Woman                                                              | 80 (36.70%) | 40 (18.35%)         | 71 (32.57%) | 17 (7.80%)          | 10 (4.59%) | 218   |
| Man                                                                | 80 (43.24%) | 20 (10.81%)         | 65 (35.14%) | 10 (5.41%)          | 10 (5.41%) | 185   |
| General, Minimally Invasive and Endocrine Surgery                  | 27 (33.33%) | 15 (18.52%)         | 31 (38.27%) | 1 (1.23%)           | 7 (8.64%)  | 81    |
| Internal Medicine, Occupational Diseases and Hypertension          | 35 (41.67%) | 11 (13.10%)         | 24 (28.57%) | 10 (11.90%)         | 4 (4.76%)  | 84    |
| Gynecology and Obstetrics                                          | 13 (16.25%) | 17 (21.25%)         | 38 (47.50%) | 9 (11.25%)          | 3 (3.75%)  | 80    |
| Orthopedic and Traumatologic Surgery                               | 43 (55.13%) | 13 (16.67%)         | 16 (20.51%) | 3 (3.85%)           | 3 (3.85%)  | 78    |
| Urology and Oncologic Urology                                      | 42 (52.50%) | 4 (5.00%)           | 27 (33.75%) | 4 (5.00%)           | 3 (3.75%)  | 80    |
| 18-35 years old                                                    | 26 (32.10%) | 16 (19.75%)         | 33 (40.74%) | 2 (2.47%)           | 4 (4.94%)  | 81    |
| 36-49 years old                                                    | 25 (28.09%) | 18 (20.22%)         | 32 (35.96%) | 9 (10.11%)          | 5 (5.62%)  | 89    |
| 50-64 years old                                                    | 36 (43.37%) | 10 (12.05%)         | 27 (32.53%) | 7 (8.43%)           | 3 (3.61%)  | 83    |
| 65-70 years old                                                    | 32 (50.00%) | 10 (15.63%)         | 17 (26.56%) | 1 (1.56%)           | 4 (6.25%)  | 64    |
| 71-92 years old                                                    | 41 (47.67%) | 6 (6.98%)           | 27 (31.40%) | 8 (9.30%)           | 4 (4.65%)  | 86    |
| Primary                                                            | 13 (41.94%) | 5 (16.13%)          | 8 (25.81%)  | 2 (6.45%)           | 3 (9.68%)  | 31    |
| Secondary                                                          | 63 (45.00%) | 15 (10.71%)         | 49 (35.00%) | 8 (5.71%)           | 5 (3.57%)  | 140   |
| Higher                                                             | 44 (29.14%) | 35 (23.18%)         | 56 (37.09%) | 10 (6.62%)          | 6 (3.97%)  | 151   |
| Basic vocational                                                   | 40 (49.38%) | 5 (6.17%)           | 23 (28.40%) | 7 (8.64%)           | 6 (7.41%)  | 81    |

| <b>25. I do not like the sole interest of medical students on patients' illnesses.</b> |             |                     |             |                     |             |       |
|----------------------------------------------------------------------------------------|-------------|---------------------|-------------|---------------------|-------------|-------|
| Answers                                                                                | Negative    | Moderately negative | Neutral     | Moderately positive | Positive    | TOTAL |
| Woman                                                                                  | 12 (5.50%)  | 19 (8.72%)          | 61 (27.98%) | 50 (22.94%)         | 76 (34.86%) | 218   |
| Man                                                                                    | 16 (8.65%)  | 8 (4.32%)           | 46 (24.86%) | 50 (27.03%)         | 65 (35.14%) | 185   |
| General, Minimally Invasive and Endocrine Surgery                                      | 2 (2.47%)   | 9 (11.11%)          | 24 (29.63%) | 11 (13.58%)         | 35 (43.21%) | 81    |
| Internal Medicine, Occupational Diseases and Hypertension                              | 6 (7.14%)   | 4 (4.76%)           | 22 (26.19%) | 23 (27.38%)         | 29 (34.52%) | 84    |
| Gynecology and Obstetrics                                                              | 3 (3.75%)   | 9 (11.25%)          | 28 (35.00%) | 29 (36.25%)         | 11 (13.75%) | 80    |
| Orthopedic and Traumatologic Surgery                                                   | 5 (6.41%)   | 4 (5.13%)           | 17 (21.79%) | 22 (28.21%)         | 30 (38.46%) | 78    |
| Urology and Oncologic Urology                                                          | 12 (15.00%) | 1 (1.25%)           | 16 (20.00%) | 15 (18.75%)         | 36 (45.00%) | 80    |
| 18-35 years old                                                                        | 1 (1.23%)   | 4 (4.94%)           | 26 (32.10%) | 33 (40.74%)         | 17 (20.99%) | 81    |
| 36-49 years old                                                                        | 6 (6.74%)   | 11 (12.36%)         | 25 (28.09%) | 24 (26.97%)         | 23 (25.84%) | 89    |
| 50-64 years old                                                                        | 8 (9.64%)   | 5 (6.02%)           | 24 (28.92%) | 15 (18.07%)         | 31 (37.35%) | 83    |
| 65-70 years old                                                                        | 4 (6.25%)   | 2 (3.13%)           | 14 (21.88%) | 17 (26.56%)         | 27 (42.19%) | 64    |
| 71-92 years old                                                                        | 9 (10.47%)  | 5 (5.81%)           | 18 (20.93%) | 11 (12.79%)         | 43 (50.00%) | 86    |
| Primary                                                                                | 4 (12.90%)  | 0 (0.00%)           | 6 (19.35%)  | 5 (16.13%)          | 16 (51.61%) | 31    |
| Secondary                                                                              | 6 (4.29%)   | 11 (7.86%)          | 38 (27.14%) | 34 (24.29%)         | 51 (36.43%) | 140   |
| Higher                                                                                 | 10 (6.62%)  | 8 (5.30%)           | 44 (29.14%) | 48 (31.79%)         | 41 (27.15%) | 151   |
| Basic vocational                                                                       | 8 (9.88%)   | 8 (9.88%)           | 19 (23.46%) | 13 (16.05%)         | 33 (40.74%) | 81    |

| <b>26. I observe that medical students tend to engage in loud conversations on the ward corridor.</b> |             |                     |             |                     |             |       |
|-------------------------------------------------------------------------------------------------------|-------------|---------------------|-------------|---------------------|-------------|-------|
| Answers                                                                                               | Negative    | Moderately negative | Neutral     | Moderately positive | Positive    | TOTAL |
| Woman                                                                                                 | 64 (29.36%) | 33 (15.14%)         | 61 (27.98%) | 32 (14.68%)         | 28 (12.84%) | 218   |
| Man                                                                                                   | 62 (33.51%) | 25 (13.51%)         | 67 (36.22%) | 13 (7.03%)          | 18 (9.73%)  | 185   |
| General, Minimally Invasive and Endocrine Surgery                                                     | 22 (27.16%) | 13 (16.05%)         | 28 (34.57%) | 9 (11.11%)          | 9 (11.11%)  | 81    |
| Internal Medicine, Occupational Diseases and Hypertension                                             | 24 (28.57%) | 14 (16.67%)         | 25 (29.76%) | 12 (14.29%)         | 9 (10.71%)  | 84    |
| Gynecology and Obstetrics                                                                             | 15 (18.75%) | 18 (22.50%)         | 24 (30.00%) | 14 (17.50%)         | 9 (11.25%)  | 80    |
| Orthopedic and Traumatologic Surgery                                                                  | 32 (41.03%) | 8 (10.26%)          | 23 (29.49%) | 5 (6.41%)           | 10 (12.82%) | 78    |
| Urology and Oncologic Urology                                                                         | 33 (41.25%) | 5 (6.25%)           | 28 (35.00%) | 5 (6.25%)           | 9 (11.25%)  | 80    |
| 18-35 years old                                                                                       | 21 (25.93%) | 17 (20.99%)         | 29 (35.80%) | 9 (11.11%)          | 5 (6.17%)   | 81    |
| 36-49 years old                                                                                       | 25 (28.09%) | 15 (16.85%)         | 30 (33.71%) | 12 (13.48%)         | 7 (7.87%)   | 89    |
| 50-64 years old                                                                                       | 23 (27.71%) | 16 (19.28%)         | 32 (38.55%) | 6 (7.23%)           | 6 (7.23%)   | 83    |
| 65-70 years old                                                                                       | 23 (35.94%) | 6 (9.38%)           | 13 (20.31%) | 8 (12.50%)          | 14 (21.88%) | 64    |
| 71-92 years old                                                                                       | 34 (39.53%) | 4 (4.65%)           | 24 (27.91%) | 10 (11.63%)         | 14 (16.28%) | 86    |
| Primary                                                                                               | 12 (38.71%) | 3 (9.68%)           | 10 (32.26%) | 0 (0.00%)           | 6 (19.35%)  | 31    |
| Secondary                                                                                             | 50 (35.71%) | 20 (14.29%)         | 42 (30.00%) | 14 (10.00%)         | 14 (10.00%) | 140   |
| Higher                                                                                                | 41 (27.15%) | 25 (16.56%)         | 50 (33.11%) | 22 (14.57%)         | 13 (8.61%)  | 151   |
| Basic vocational                                                                                      | 23 (28.40%) | 10 (12.35%)         | 26 (32.10%) | 9 (11.11%)          | 13 (16.05%) | 81    |

| <b>27. I am concerned that medical students will not preserve medical confidentiality.</b> |             |                     |             |                     |             |       |
|--------------------------------------------------------------------------------------------|-------------|---------------------|-------------|---------------------|-------------|-------|
| Answers                                                                                    | Negative    | Moderately negative | Neutral     | Moderately positive | Positive    | TOTAL |
| Woman                                                                                      | 69 (31.65%) | 41 (18.81%)         | 64 (29.36%) | 24 (11.01%)         | 20 (9.17%)  | 218   |
| Man                                                                                        | 62 (33.51%) | 25 (13.51%)         | 68 (36.76%) | 12 (6.49%)          | 18 (9.73%)  | 185   |
| General, Minimally Invasive and Endocrine Surgery                                          | 23 (28.40%) | 13 (16.05%)         | 32 (39.51%) | 4 (4.94%)           | 9 (11.11%)  | 81    |
| Internal Medicine, Occupational Diseases and Hypertension                                  | 32 (38.10%) | 13 (15.48%)         | 22 (26.19%) | 6 (7.14%)           | 11 (13.10%) | 84    |
| Gynecology and Obstetrics                                                                  | 12 (15.00%) | 19 (23.75%)         | 32 (40.00%) | 13 (16.25%)         | 4 (5.00%)   | 80    |
| Orthopedic and Traumatologic Surgery                                                       | 34 (43.59%) | 13 (16.67%)         | 17 (21.79%) | 11 (14.10%)         | 3 (3.85%)   | 78    |
| Urology and Oncologic Urology                                                              | 30 (37.50%) | 8 (10.00%)          | 29 (36.25%) | 2 (2.50%)           | 11 (13.75%) | 80    |
| 18-35 years old                                                                            | 24 (29.63%) | 16 (19.75%)         | 30 (37.04%) | 10 (12.35%)         | 1 (1.23%)   | 81    |
| 36-49 years old                                                                            | 22 (24.72%) | 21 (23.60%)         | 31 (34.83%) | 9 (10.11%)          | 6 (6.74%)   | 89    |
| 50-64 years old                                                                            | 27 (32.53%) | 14 (16.87%)         | 27 (32.53%) | 8 (9.64%)           | 7 (8.43%)   | 83    |
| 65-70 years old                                                                            | 24 (37.50%) | 7 (10.94%)          | 20 (31.25%) | 2 (3.13%)           | 11 (17.19%) | 64    |
| 71-92 years old                                                                            | 34 (39.53%) | 8 (9.30%)           | 24 (27.91%) | 7 (8.14%)           | 13 (15.12%) | 86    |
| Primary                                                                                    | 12 (38.71%) | 2 (6.45%)           | 10 (32.26%) | 4 (12.90%)          | 3 (9.68%)   | 31    |
| Secondary                                                                                  | 52 (37.14%) | 19 (13.57%)         | 42 (30.00%) | 12 (8.57%)          | 15 (10.71%) | 140   |
| Higher                                                                                     | 41 (27.15%) | 30 (19.87%)         | 56 (37.09%) | 13 (8.61%)          | 11 (7.28%)  | 151   |
| Basic vocational                                                                           | 26 (32.10%) | 15 (18.52%)         | 24 (29.63%) | 7 (8.64%)           | 9 (11.11%)  | 81    |

**28. I do not feel comfortable when a medical student partakes in the examination of my intimate areas.**

| Answers                                                   | Negative    | Moderately negative | Neutral     | Moderately positive | Positive    | TOTAL |
|-----------------------------------------------------------|-------------|---------------------|-------------|---------------------|-------------|-------|
| Woman                                                     | 33 (15.14%) | 35 (16.06%)         | 36 (16.51%) | 40 (18.35%)         | 74 (33.94%) | 218   |
| Man                                                       | 53 (28.65%) | 18 (9.73%)          | 45 (24.32%) | 31 (16.76%)         | 38 (20.54%) | 185   |
| General, Minimally Invasive and Endocrine Surgery         | 16 (19.75%) | 8 (9.88%)           | 18 (22.22%) | 9 (11.11%)          | 30 (37.04%) | 81    |
| Internal Medicine, Occupational Diseases and Hypertension | 21 (25.00%) | 9 (10.71%)          | 15 (17.86%) | 15 (17.86%)         | 24 (28.57%) | 84    |
| Gynecology and Obstetrics                                 | 5 (6.25%)   | 20 (25.00%)         | 21 (26.25%) | 19 (23.75%)         | 15 (18.75%) | 80    |
| Orthopedic and Traumatologic Surgery                      | 16 (20.51%) | 10 (12.82%)         | 12 (15.38%) | 17 (21.79%)         | 23 (29.49%) | 78    |
| Urology and Oncologic Urology                             | 28 (35.00%) | 6 (7.50%)           | 15 (18.75%) | 11 (13.75%)         | 20 (25.00%) | 80    |
| 18-35 years old                                           | 10 (12.35%) | 20 (24.69%)         | 25 (30.86%) | 15 (18.52%)         | 11 (13.58%) | 81    |
| 36-49 years old                                           | 9 (10.11%)  | 11 (12.36%)         | 18 (20.22%) | 26 (29.21%)         | 25 (28.09%) | 89    |
| 50-64 years old                                           | 21 (25.30%) | 9 (10.84%)          | 20 (24.10%) | 11 (13.25%)         | 22 (26.51%) | 83    |
| 65-70 years old                                           | 21 (32.81%) | 5 (7.81%)           | 9 (14.06%)  | 8 (12.50%)          | 21 (32.81%) | 64    |
| 71-92 years old                                           | 25 (29.07%) | 8 (9.30%)           | 9 (10.47%)  | 11 (12.79%)         | 33 (28.37%) | 86    |
| Primary                                                   | 4 (12.90%)  | 4 (12.90%)          | 2 (6.45%)   | 6 (19.35%)          | 15 (48.39%) | 31    |
| Secondary                                                 | 30 (21.43%) | 17 (12.14%)         | 32 (22.86%) | 22 (15.71%)         | 39 (27.86%) | 140   |
| Higher                                                    | 23 (15.23%) | 25 (16.56%)         | 27 (17.88%) | 32 (21.19%)         | 44 (29.14%) | 151   |
| Basic vocational                                          | 29 (35.80%) | 7 (8.64%)           | 20 (24.69%) | 11 (13.58%)         | 14 (17.28%) | 81    |

**29. I am comfortable with being examined by a female medical student.**

| Answers                                                   | Negative    | Moderately negative | Neutral     | Moderately positive | Positive    | TOTAL |
|-----------------------------------------------------------|-------------|---------------------|-------------|---------------------|-------------|-------|
| Woman                                                     | 9 (4.13%)   | 2 (0.92%)           | 61 (27.98%) | 49 (22.48%)         | 97 (44.50%) | 218   |
| Man                                                       | 16 (8.65%)  | 10 (5.41%)          | 68 (36.76%) | 19 (10.27%)         | 72 (38.92%) | 185   |
| General, Minimally Invasive and Endocrine Surgery         | 7 (8.64%)   | 2 (2.47%)           | 28 (34.57%) | 8 (9.88%)           | 36 (44.44%) | 81    |
| Internal Medicine, Occupational Diseases and Hypertension | 9 (10.71%)  | 2 (2.38%)           | 29 (34.52%) | 12 (14.29%)         | 32 (38.10%) | 84    |
| Gynecology and Obstetrics                                 | 3 (3.75%)   | 1 (1.25%)           | 29 (36.25%) | 30 (37.50%)         | 17 (21.25%) | 80    |
| Orthopedic and Traumatologic Surgery                      | 1 (1.28%)   | 5 (6.41%)           | 19 (24.36%) | 9 (11.54%)          | 44 (56.41%) | 78    |
| Urology and Oncologic Urology                             | 5 (6.25%)   | 2 (2.50%)           | 24 (30.00%) | 9 (11.25%)          | 40 (50.00%) | 80    |
| 18-35 years old                                           | 3 (3.70%)   | 0 (0.00%)           | 32 (39.51%) | 19 (23.43%)         | 27 (33.33%) | 81    |
| 36-49 years old                                           | 2 (2.25%)   | 7 (7.87%)           | 34 (38.20%) | 23 (25.84%)         | 23 (25.84%) | 89    |
| 50-64 years old                                           | 8 (9.64%)   | 3 (3.61%)           | 29 (34.94%) | 13 (15.66%)         | 30 (36.14%) | 83    |
| 65-70 years old                                           | 6 (9.38%)   | 1 (1.56%)           | 16 (25.00%) | 5 (7.81%)           | 36 (56.25%) | 64    |
| 71-92 years old                                           | 6 (6.98%)   | 1 (1.16%)           | 18 (20.93%) | 8 (9.30%)           | 53 (61.63%) | 86    |
| Primary                                                   | 4 (12.90%)  | 0 (0.00%)           | 0 (0.00%)   | 6 (19.35%)          | 21 (67.74%) | 31    |
| Secondary                                                 | 5 (3.57%)   | 4 (2.86%)           | 45 (32.14%) | 17 (12.14%)         | 69 (49.29%) | 140   |
| Higher                                                    | 6 (3.97%)   | 6 (3.97%)           | 61 (40.40%) | 33 (21.85%)         | 45 (29.80%) | 151   |
| Basic vocational                                          | 10 (12.35%) | 2 (2.47%)           | 23 (28.40%) | 12 (14.81%)         | 34 (41.98%) | 81    |

**30. I am comfortable with being examined by a male medical student.**

| Answers                                                   | Negative    | Moderately negative | Neutral     | Moderately positive | Positive    | TOTAL |
|-----------------------------------------------------------|-------------|---------------------|-------------|---------------------|-------------|-------|
| Woman                                                     | 45 (20.64%) | 35 (16.06%)         | 63 (28.90%) | 37 (16.97%)         | 38 (17.43%) | 218   |
| Man                                                       | 15 (8.11%)  | 8 (4.32%)           | 71 (38.38%) | 23 (12.43%)         | 68 (36.76%) | 185   |
| General, Minimally Invasive and Endocrine Surgery         | 7 (8.64%)   | 2 (2.47%)           | 28 (34.57%) | 8 (9.88%)           | 36 (44.44%) | 81    |
| Internal Medicine, Occupational Diseases and Hypertension | 9 (10.71%)  | 2 (2.38%)           | 29 (34.52%) | 12 (14.29%)         | 32 (38.10%) | 84    |
| Gynecology and Obstetrics                                 | 3 (3.75%)   | 1 (1.25%)           | 29 (36.25%) | 30 (37.50%)         | 17 (21.25%) | 80    |
| Orthopedic and Traumatologic Surgery                      | 1 (1.28%)   | 5 (6.41%)           | 19 (24.36%) | 9 (11.54%)          | 44 (56.41%) | 78    |
| Urology and Oncologic Urology                             | 5 (6.25%)   | 2 (2.50%)           | 24 (30.00%) | 9 (11.25%)          | 40 (50.00%) | 80    |
| 18-35 years old                                           | 3 (3.70%)   | 0 (0.00%)           | 32 (39.51%) | 19 (23.43%)         | 27 (33.33%) | 81    |
| 36-49 years old                                           | 2 (2.25%)   | 7 (7.87%)           | 34 (38.20%) | 23 (25.84%)         | 23 (25.84%) | 89    |
| 50-64 years old                                           | 8 (9.64%)   | 3 (3.61%)           | 29 (34.94%) | 13 (15.66%)         | 30 (36.14%) | 83    |
| 65-70 years old                                           | 6 (9.38%)   | 1 (1.56%)           | 16 (25.00%) | 5 (7.81%)           | 36 (56.25%) | 64    |
| 71-92 years old                                           | 6 (6.98%)   | 1 (1.16%)           | 18 (20.93%) | 8 (9.30%)           | 53 (61.63%) | 86    |
| Primary                                                   | 4 (12.90%)  | 0 (0.00%)           | 0 (0.00%)   | 6 (19.35%)          | 21 (67.74%) | 31    |
| Secondary                                                 | 5 (3.57%)   | 4 (2.86%)           | 45 (32.14%) | 17 (12.14%)         | 69 (49.29%) | 140   |
| Higher                                                    | 6 (3.97%)   | 6 (3.97%)           | 61 (40.40%) | 33 (21.85%)         | 45 (29.80%) | 151   |
| Basic vocational                                          | 10 (12.35%) | 2 (2.47%)           | 23 (28.40%) | 12 (14.81%)         | 34 (41.98%) | 81    |
